**MicroRNA regulation of CTP synthase and cytoophidium in *Drosophila melanogaster***

**Najat Dzaki<sup>1\*</sup>, Woo Wai Kan<sup>1\*</sup> and Ghows Azzam<sup>1,2\*</sup>**

<sup>1</sup>*School of Biological Sciences, Universiti Sains Malaysia, 11800 Penang, Malaysia*

<sup>2</sup>*Vector Control and Research Unit, School of Biological Sciences, Universiti Sains Malaysia, 11800 Penang, Malaysia*

\*Equal contribution

\*Corresponding author

Email: ghows@usm.my (G.A)

Key words: MicroRNA, CTPsyn, cytoophidium, *D. melanogaster*

## Abstract

CTPsyn is a crucial metabolic enzyme which synthesizes CTP molecules through the *de novo* or salvage pathway. It has the extraordinary ability to compartmentalize into filaments termed cytoophidia. Although this property is retained amongst orthologues, and cytoophidia are therefore found across kingdoms, the mechanisms behind their formation remain unknown. Micro-RNAs (miRNAs) are single-stranded RNA with length of 20 – 22 nucleotides, capable of exerting mRNA silencing and degradation as a form of regulation. *D. melanogaster* itself has a high total gene count to miRNA gene number ratio, alluding to the possibility that *CTPsyn* may too come under the regulatory effects of these small RNAs. A thorough miRNA overexpression involving 123 UAS-miRNA lines, followed by staining of ovarian cytoophidia *dme-egg* chambers, revealed a small group of candidates which confer either a lengthening or truncating effect on the structure. Prime candidates are identified on the basis of consistency. MiR-975 and miR-1014 are both cytoophidia-elongating, whereas miR-190 and miR-932 are cytoophidia-shortening. Though target prediction shows that miR-975 and miR-932 do indeed have binding sites on *CTPsyn* mRNA, *in vitro* assays instead revealed that none of the four candidates may actually do so. This suggests that the effects asserted by overexpressed miRNAs indirectly reach CTPsyn and its cytoophidia through the actions of middling elements. *In silico* target prediction and qPCR quantification indicated that, at least for miR-932 and miR-1014, these undetermined elements may be players in fat metabolism. This is the first study to thoroughly investigate miRNAs in connection to CTPsyn expression and activity in any species. The findings presented could serve as a basis for further queries into not only the fundamental aspects of the enzyme's regulation, but may uncover new facets of closely related pathways as well.

## 1.0 Introduction

No biotic life is capable of surviving without carrying out the chemical processes and energy changes known as metabolism. Disruption to metabolic enzymes are known to have adverse effects, including decreased muscular plasticity and higher risk of premature death among the young (Schnurr, Yin, and Scott, 2014), as well as increased chances of developing chronic diseases in later life (Ashrafi, 2007; Dang, 2012; Tuck, 1990). One such metabolic enzyme is CTP Synthase (CTPsyn). Its importance lies in the importance of its product. The enzyme synthesizes the cytidine triphosphate (CTP) nucleotide (Kammen and Hurlbert, 1959; Lieberman, 1956), which is not only one of the building blocks of our DNA and RNA, but is a known energy source and cofactor of other enzymatic reactions (Blackburn *et al.*, 2006). The nucleotide also acts as the seed molecule within the phospholipid and sialoglycoprotein synthesis pathways (Yang, Bruno, and Carman, 1996).

A property which distinguishes CTPsyn from other synthases is its ability to tether into filamentous structures called cytoophidia (Liu, 2010). These are observed in a number of organisms including some bacteria (Ingerson-Mahar *et al.*, 2010), yeast, mice (Noree *et al.*, 2010) and humans (Chen *et al.*, 2011). In *D. melanogaster*, the filaments are found in multiple tissues (Liu, 2010), formed singularly by one of the fly's three CTPsyn isoforms i.e. Isoform C (CTPsynIsoC) (Azzam and Liu, 2013). Cytoophidia are particularly abundant in its ovaries, easily discernible in both follicle and nurse cells of egg chambers. Ovarian cytoophidia are known to change dynamically in response to microenvironmental factors, both morphologically and numerically. For instance, they are both elongated and more numerous in deteriorating cells (Liu, 2010). Meanwhile, the knockdown of the proto-oncogene *Myc* has been shown to significantly shorten micro-cytoophidia within follicle cells (Aughey, Grice, and Liu, 2016).

Whilst the cross-kingdom conservation of cytoophidia indicates that the structure may play vital roles, what these may be largely remains a mystery. In

humans, filamentation increases the catalytic capability of CTPsyn by positioning them into conformations which facilitate their activity (Lynch *et al.*, 2017). However, the opposite is true in *D. melanogaster*, whereby the structure's formation has instead been shown to act as a means to negatively regulate *dme*CTPsyn activity (Aughey and Liu, 2015). The *dme*cytoophidium is also heterogeneous: immunostaining has indicated that it is made of more than just CTPsyn molecules, though these too are yet to be revealed (Liu, 2011). What, then, are the regulatory elements governing CTPsyn and its associated functions? More importantly, how do they do so?

*D. melanogaster* carries a relatively large proportion of microRNA (miRNA) genes. It is believed that these powerful attenuators of translation could be responsible for the regulation of 90% of its protein-coding genes. Many have been identified in various roles throughout the fly's development, including cell fate specification (Li *et al.*, 2006), tissue growth and cell survival (Brennecke *et al.*, 2003), as well as aging and neurodegeneration (NLiu *et al.*, 2012). Furthermore, multiple metabolic processes are regulated by these small RNAs. For example, a trinity of fat, steroid, and insulin pathways are reliant on the interplay between *dme*-miR-8 and *dme*-mir-14 (Jin, Kim, and Hyun, 2012; Karres *et al.*, 2007; Varghese and Cohen, 2007).

In our study, we screened 234 miRNA overexpression lines using GAL4 drivers active in ovaries of *D. melanogaster* to examine the effects of overexpression of individual miRNAs towards CTPsyn-cytoophidia. Fifteen were found to either shorten or elongate these filaments, though ultimately only four were found to be consistent enough to warrant further investigation. Whilst it was subsequently found that none of these may elicit CTPsyn mRNA directly, *in silico* target prediction followed immediately by prediction-validation by way of qPCR analysis implicated pathways which may be linked to cytoophidia formation. It is hoped that the

knowledge provided by this study will go on to aid future breakthroughs concerning CTPsyn and cytoophidia regulation.

## 2.0 Materials and Methods

### 2.1 Fly rearing and maintenance

All stocks were raised at 25°C on standard cornmeal-based food, modified to fit the local climate and availability of ingredients. Flies are transferred onto fresh food every three weeks. Weak lines are propagated with the addition of wet yeast.

### 2.2 Selection of driver and miRNA lines

Oregon-R are used as wild-type controls in all experiments unless indicated otherwise. Drivers were chosen on the basis of expression patterns, strength, and relatability to the objectives of an experiment. Expression localization is determined through crosses of each individual driver-GAL4 line to a  $w[*]; UAS-IVS-mCD8::GFP$  line. A list of stocks used in this thesis are listed in Supplementary Table S1.

### 2.3 miRNA overexpression screen

To generate miRNA-overexpressing flies, lines bearing selected driver-GAL4 constructs are crossed to UAS-bearing lines carrying an extra copy of either a particular or a cluster of pre-miRNA sequences. Follicle cell driver-GAL4 lines #108022 ( $P\{w[+mW.hs]=GawB\}T155$ ) and #107204 ( $C323a-GawB(GAL4), w[1118]$ ) are crossed to all available miRNA lines. A ubiquitous driver line #107727 ( $y[1] w[*]; Act5C-GAL4/ CyO$ ) are crossed only to lines whereby the overexpression of the miRNA does not cause death before eclosion could occur (Schertel, Rutishauser, Förstemann, and Basler, 2012). Line #107748 ( $y[1] w[*]; nos-GAL4$ ) is crossed to all miRNA lines whereby the UAS-construct was inserted with the  $p$  plasmid variant, which enables germline-cell expression. All crosses are made on food supplemented with wet yeast, with double the number of females to males, and kept at 28°C for the

whole duration of mating and growth. Progenies are transferred onto wet yeast two days after eclosion to encourage ovary engorgement.

## 2.4 Immunofluorescence

Females are isolated after a maximum of 48 hours on wet yeast. Dissection is conducted in lab-standard PBT (1X PBS with 0.2% Triton-X). Ovaries are fixed with 4% paraformaldehyde (PFA) for 10 minutes, then washed thrice with PBT at room temperature for 20 minutes per cycle. PBT is removed completely before blocking with PBTB (PBT with 5% normal goat serum) for a minimum of one hour. Nutation with primary antibody lasts overnight at room temperature (1:200 of rabbit anti-*dme-CTPsyn* (code #SY4468), courtesy of Liu lab). Ovaries are washed for another three cycles with PBT, then incubated overnight with secondary antibodies (1:2000 of DAPI; 1:500 of DY488 goat anti-rabbit; and 1:500 of DY555 Phalloidin, wherever necessary, and all purchased from Life Technologies, USA). Samples are mounted in secondary antibody and viewed under a laser-scanning confocal microscope (Zeiss LSM710, Oberkochen, Germany).

## 2.5 Plasmid construct production and purification

Two types of constructs are designed to ascertain whether any of the strong candidate miRNAs could elicit *CTPsyn* mRNA directly: (A) one bearing the 3'UTR sequence of *CTPsyn*, and (B) independent overexpression constructs for each miRNA. For A, a 298bp-long sequence immediately downstream of the stop codon of the *CTPsynIsoC* gene was incorporated to the end of the eGFP gene on the selected plasmid backbone (pCaSpeR4; Genbank#: X81645). For B, constructs were incorporated into a plasmid with a ubiquitous promoter (Ac in this case, within pAc360; Genbank#: A13228). Mimic-primary-miRNAs (*mpri-miRNA*) were generated, consisting of each miRNA-gene's premature sequence along with ~100bp nucleotides flanking it either way. All were introduced into and propagated within

DH5 $\alpha$  *E. coli* cells (ThermoFisher Scientific, USA). Primer details are available in Supplementary Table S2. Plasmids were purified prior to transfection using the Wizard® Plus SV Minipreps DNA Purification System from Promega (Cat. No #A1330, USA).

## **2.6 S2 cell preparation and transfection**

S2 cell-variant i.e. S2R+ are acquired as frozen stock from Drosophila Genomics Resource Centre (DGRC) and revived as instructed. Schneider's Insect medium (Sigma Cat. #S0146) enriched with 10% fetal bovine serum (FBS, Gibco Cat. #10270) and 1% Penicillin-Streptomycin (Invitrogen Cat. #15070-063) is used as culturing media. Cells were maintained at 27°C in an incubator without CO<sub>2</sub>. S2 cells at full confluency in T-75 flasks are resuspended and counted.  $1 \times 10^5$  cells/ml and  $2 \times 10^4$  cells/ml were seeded into 6-well and 24-well plates, respectively. Plates are returned to the growth incubator for 20 to 24 hours prior to transfection. Effectene® (Qiagen Cat. #301425) is used exclusively as the transfection reagent in ratios recommended within manufacturer's instructions. Each instance of plasmid introduction is followed by an incubation period of 60 hours.

## **2.7 Flow cytometry**

Cells doubly transfected with pTub-eGFP-3'UTR-IsoC and pAc-360-miRXov were fixed with fresh 4% PFA in sterile PBS for 15 minutes at room temperature. Successive steps were as described elsewhere (UToronto, 2017). Signal normalizing controls include (a) empty pTub-eGFP backbone, and (b) pTub-eGFP-3'UTR-IsoC doubly transfected with empty pAc-360 backbone, and (c) S2R+ cells supplemented with Enhancer®/Effectene® complex, but without any plasmid DNA. Statistical significance in signal intensity differences were determined by simple Student T-test.

## 2.8 Candidate miRNA target prediction

*In silico* target prediction of candidate miRNAs were conducted through TargetScanFly6 (Kheradpour *et al.*, 2007), with a version last updated in 2015. The top three non-hypothetical proteins listed are considered top hits; however, if a gene within sight is known to be directly related to cellular localization or biogenesis *and* is highly expressed in reproductive tissue i.e. ovaries or testes, it is included over another gene which show neither of those characteristics, despite being a more highly ranked target. Gene ontology details and RNA-seq data were retrieved from publicly available information on FlyBase (Gelbart *et al.*, 1997; Gelbart and Emmert, 2013). Target mRNA-specific primer pairs were designed on the Primer3 (<http://bioinfo.ut.ee/primer3-0.4.0/>) platform or through NCBI's own primer-pick function. These are named accordingly, with the acronym of its candidate miRNA preceding the gene, e.g. *m932-geneX*, and are viewable in Supplementary Table S3. Another function of TargetScanFly i.e. ORF was used to corroborate predictions, by introducing the 3'UTR sequence of CTPsyn (CG6854) into the software.



### 3.0 Results

#### 3.1 Cytoophidia-affecting miRNAs

In order to look for miRNAs that are affecting CTPsyn, we carried out an overexpression screen of miRNAs and look for the changes in cytoophidium as an indicator. Crosses were made between a virgin driver-GAL4 female and a UAS-*miR-X* male; *X* represents any miRNA. Each cross was repeated at least thrice. Reciprocals were made at random, to assess whether outcomes were sex-influenced. A total of 123 miRNAs borne by 234 fly lines were screened (listed in Supplementary Table S1). Traits of note were primarily cytoophidia length, numbers, and density or compaction. Affected polarity and the discombobulation of cell shape and size were secondarily considered. Screening was carried out in order, i.e. first using the FCDs *T155-GAL4* and *c323a-GAL4*, followed by the *nos-GAL4* germline-cell driver, and lastly the ubiquitous *Act5C-GAL4*. The reference phenotypes utilized as controls for all crosses were driver-dependent i.e. based on the morphology of cytoophidia in *driver-GAL4>Oregon-R* flies. It is worth noting that certain drivers do appear to have minor cytoophidia-altering effects, even without the overexpression of miRNAs (Figure 1).

In the primary stage of screening (with FCDs), a candidate miRNA is shortlisted if its overexpression was observed to cause changes to any of the mentioned traits. If the candidate showed replicability i.e. same phenotype was observed in the next bioreplicates of the cross, it was retained for secondary screening (with *nos* or *Act5c* GAL4-drivers). Some miRNAs were represented by more than one UAS-*miRX* lines i.e. 'cousin-constructs'. They differ by chromosomal location and point of insertion within the *D. melanogaster* genome. In such cases, the miRNA's overexpression by the cousin-construct should also produce a similar outcome, although leniency was given in the way of phenotypic strength. Extremity of phenotypic manifestations and reproducibility under the varied array of drivers

utilized allowed us to rank cytoophidia-elongating (CytEI) and cytoophidia-shortening (CytSh) miRNAs for the purpose of downstream prioritization. The full list of candidates from all three stages of screening is represented as Table 1. miRNAs marked with an asterisk (\*) were eventually shortlisted as prime candidates.

### 3.2 Prime CytEI candidate miRNAs

#### 3.2.1 MiR-975 elongates cytoophidia and forms 32 cell egg chambers

Nine CytEI-miRNAs were identified. Two were considered prime candidates due to their consistency at inducing the lengthening of cytoophidia i.e. miR-975 and miR-1014. Both miRNAs are insect exclusive, and neither have reported human paralogues. The miRNA-975 is carried by 9 lines, in various combinations (Refer to Supplementary Table S1 for full details). On the *Drosophila* genome, its gene is a part of a tri-miRNA cluster, alongside miR-976 and miR-977 (Ryazansky, Gvozdev, and Berezikov, 2011). This cluster is regionally associated with miR-4966 upstream, as well as miR-978 and miR-979 genes downstream, although their expressions are dependent on separate transcription start sites (Figure 2A; (Marco *et al.*, 2013)).

Throughout the overexpression screen, egg chambers overexpressing miR-975 alone showed significant lengthening of cytoophidia. Whereas elongation was more obvious within nurse cells under FCD-driven expression, the phenotype was obvious in both follicle clearly exhibited by both follicle and nurse cells under *Act5c-GAL4*. Out-of-the-ordinary numbers of micro-cytoophidia did not accompany macro-cytoophidia elongation in either case (Figures 3A and 3B). These observations were repeatable as miR-975 was expressed in a cluster with miR-976 and miR-977, or as a pair with miR-978, though to a lesser degree (Figures 3C and 3D). With miR-975 sharing a construct with miR-4966, it did not cause cytoophidia-lengthening effects, alluding to the possibility that these genes may co-regulate each other's activity (Figure 3E). However, miR-975 overexpression by the *Act5c-GAL4* driver did not

bear cell-death inducing effects. Instead, we have observed the formation of 32 cell egg chamber with a penetration of 2% (n=348) (Figure 3F).

### 3.2.2 MiR-1014 elongates cytophidia and causes cell death

The second CytEI-miRNA identified as a prime candidate is miR-1014, carried by three fly lines. *In vivo*, miR-1014 occupies a locus on chromosome 3, within the intronic regions of the *salt* gene (Figure 2B). Overexpression of miR-1014 consistently induced the elongation of cytophidia regardless of driver and UAS-construct, though one induced greater effects than the rest (Figure 4A to 4C). Elongation patterns are akin to those described for miR-975. However, excessive miR-1014 levels did appear to negatively impact cell survivability. An estimated 22.35% (n=464) of egg chambers of stage 8 and above were discernably undergoing apoptosis in these ovaries (Figure 4D), a significant increase from natural cell death rates seen in *Act5ct-GAL4>Oregon-R* controls as well as amongst miR-975 overexpressing flies. Nurse cell nuclei doubling phenotypes were not recovered under miR-1014 overexpression.

### 3.3 Prime CytSh candidate miRNAs

#### 3.3.1 MiR-190 and miR-932 shorten cytoophidia without significant distinguishing side effects

Six miRNAs were determined to shorten cytoophidia. Two were identified as prime CytSh-miRNAs, namely miR-190 and miR-932. Four UASp-lines encode singularly for *miR-190*: two carry the gene on chromosome 2. For the other two, the gene is inserted into chromosome 3, where the endogenous *dme-miR-190* should also be found (Figure 2C). Its locus is intronic to the *rhea* gene. Overexpression of the miRNA exhibit cytoophidia shortening consistently. The shortening of these filaments is often observed alongside its compaction, and increased numbers of micro-cytoophidia.

Its overexpression is most obvious under *nos-GAL4*, followed by *Act5c-GAL4*. As truncation was already observed in crosses involving FCDs, shortening could only be ascertained by the near disappearance of cytoophidia (Figures 5A, 5C and 5E). Placement of the miRNA-gene within UAS-constructs did not significantly affect outcomes (Figures 5B, 5D and 5F). However, though *Act5c*-driven overexpression of miR-190 was expected to be lethal (Schertel *et al.*, 2012), we often recovered healthy flies which displayed neither signs of compromised fitness nor fertility. More importantly, whereas miR-190 overexpression under FCD showed truncation of both follicle and nurse cell cytoophidia, *nos-GAL4* and *Act5c-GAL4*-driven truncation of macro-cytoophidia within germline nurse cells was not accompanied by the shortening of follicle-cell micro-cytoophidia.

The second prime CytSh-candidate is identified as miR-932. Like miR-975 and miR-1014, the miRNA is also exclusive to arthropods. Three UASp-lines carry this construct. In vivo, the *dme-miR-932* gene is intronic to the gene *Nlg2*, found on chromosome 2 (Figure 2D). It induces a severe shortening effect on cytoophidia, as well as an increase in micro-cytoophidia numbers in both nurse cells and the

developing oocyte. Shortening of follicle-cell cytophidia due to overexpression of miR-932 was comparatively more noticeable than that of flies overexpressing miR-190 (Figure 6A to 6D). However, miR-932 carried by the transgenic line IMCB #3038 produces inconsistent phenotypes, where highly-dense, misshapen macrocytophidia appeared alongside truncated ones (Figure 6E).

Similar to *dme-miR-190*, Schertel et al. has also reported that excessive levels of *dme-miR-932* would lead to lethality. We found that whilst *Act5c-GAL4>UAS-miR932* flies were viable, their numbers were lower than the F1 produced from the other three prime candidates. This adverse effect on population size was especially true when the *Act5c* driver was crossed to *UASp-miR932* insert in chromosome 2 (Figure 7), with recovered F1 numbers dropping to half of the other two constructs (#3038 vs #3036 vs #116480:  $21 \pm 4.74$  vs  $138 \pm 11.32$  vs  $108 \pm 9.86$ ).

### **3.4 Assessing prime candidate miRNA potential for direct regulation of *CTPsynIsoC* mRNA**

Activity of overexpression-constructs and its non-lethality to S2R+ cells was confirmed in a preliminary transfection round (see Supplementary Figure S1). These constructs were then co-transfected with a reporter plasmid, which has had the *CTPsynIsoC* mRNA 3'UTR sequence attached to the end of an *eGFP*-gene (Lai, 2002). The proportion of eGFP-positive cells detected through flow cytometry was reduced with the overexpression of all candidate miRNAs. However, T-test confirmed that only the cells transfected with CytEI-miRNA constructs i.e. of miR-975 and miR-1014 ( $p < 0.05$ ) showed significant reduction in eGFP signal intensity. Nonetheless, such changes were underwhelming and therefore unconvincing in comparison to controls. 22.97% and 21.55% eGFP-positive cells were detected in miR-975 and miR-1014 overexpressing culture, respectively, compared to the 29.50% eGFP-positive cells in the control culture. Together, these observations suggest that none of the candidates elicit *CTPsynIsoC* mRNA directly. The effects they exert upon the enzyme and its cytophidia therefore involve mediating parties. Results are summarized in Figure 8.

### 3.5 *In silico* target prediction outcomes

TargetScanFly prediction tool uses complementary-seed-pairing to identify potential targets of any of 148 *dme*-miRNAs within its database (Lewis, Burge, and Bartel, 2005). Only matches to regions in the 3'UTR of *D. melanogaster* mRNAs are considered. Each predicted mRNA target is scored by seed-complementarity based on canonical target sites (Grimson *et al.*, 2007), which are then ranked by weightage. Highest weight is given for an 8mer complementarity, followed by 7mer-m8 (perfect match of positions 2 to 8 of a mature miRNA) and 7mer-1A (exact match of positions 2 to 7 of mature miRNA, followed by an A). The number of mRNA targets are given, followed by numbers of conserved (CS) and poorly-conserved (PCS) binding sites. The total of binding sites often exceeds number of targets, as the candidate miRNA may bind to more than a single site on a single mRNA. Top-three ranked genes for each of the prime CytSh and CytEI-miRNAs are listed, along with gene ontology and expressional traits, in Table 2. Primer pairs designed to specifically (and redundantly, where there are transcript variants and isoforms) target their mRNA in qPCR are listed in Supplementary Table S3. MiRNAs with potential to elicit the 3'UTR of *CTPsynIsoC* were also sought through TargetScanFly ORF. Two of the four prime candidate miRNAs i.e. miR-975 and miR-932 were found to have possible binding sites on the gene's mRNA, albeit at low probabilities (Supplementary Table S4).



### 3.6 qPCR analysis against predicted *in silico* targets

In order to determine the target of the miRNAs, qPCR were carried out against the top-three annotated predicted targets specific to each candidate as a means for validation. *CTPsynIsoC* was included as well, to further ascertain whether the overexpression of any of the candidates would affect the gene directly. Results are shown in Figure 9. Controls were either cells transfected with empty pAc-backbone (top) or *Act5c-GAL4>Oregon-R ovaries* (bottom).

Expressional outliers were apparent right away. For instance, *ChAT* was found to be upregulated in miR-190 overexpressing cells. The same was observed in ovarian tissue, accompanied by significantly greater levels of *CTPsynIsoC*. *Srpk79D* levels also surged in both miR-932-overexpressing cells and ovaries, where its downturn was expected. Otherwise, the expression profile of the four genes under assessment mirrored each other for this CytSh-miRNA, regardless of tissue-type. The same cannot be said for miR-1014-overexpressing tissues. Although all three of its predicted targets were downregulated, reductions to both *CrebA* and *CdsA* in ovarian tissue were considerably less prominent than they were in cell culture. Nevertheless, no differences were more so stark than those conferred by miR-975 in cells as opposed to ovaries: where *koi* was downregulated in cells, it was unchanged in ovaries; where *spen* was downregulated in cells, it was upregulated in ovaries. *CTPsynIsoC* levels were also much higher in *Act5c-GAL4>UAS-miR975* ovaries, with an fc of 3.45 to the meagre 0.45 in cells. These dissimilarities convey that, at least for some miRNAs, differences in the *in vitro* vs *in vivo* microenvironment do indeed play a role in the effects they assert upon gene expression.

## 4.0 Discussion

### 4.1 MiRNA overexpression in follicle cells contributes to non-cell autonomous cytoophidia regulation

Throughout the first stage of screening using follicle cell drivers (FCD), we consistently observed the peculiarity that eventhough GAL4 was only expected to be activated in follicle-cells, nurse cell macro-cytoophidia often appeared affected by miRNA-overexpression. This non-autonomous nature of macro-cytoophidia regulation was also observed to a certain extent within driver-specific controls. Of the three types (FCDs, *nos* and *Act5c*) utilized in this study, only *nos-GAL4>Oregon-R* did not show visibly truncated cytoophidia. We were able to take advantage of this outcome in shortlisting candidate miRNAs; however, its true significance lies in novel aspects of soma-to-germ cells communication it may have shown, specifically between that of follicle and nurse cells of the egg chamber (FNCC). The importance of intercellular communication during embryogenesis is well-understood (Mahowald and Hardy, 1985). The oocyte is dependent on the systematic deposition of maternal factors from nurse cells throughout embryonic development. In the meantime, encapsulating follicle cells provide the oocyte the nutrients it requires for growth. Both examples of “material dumping” occur through specialized gap junction from follicle cells, or ring canals from nurse cells (Cabej, 2012). Comparatively, however, little is known of how FNCC takes place between follicle and nurse cells – if such events happen at all.

Overexpression of candidate miRNAs in follicle cells were consistently apparent within nurse cells. This suggests that FNCC does indeed take place. Two observations especially supported this claim: (A) excessive levels of CytEI-miRNAs (i.e. miR-975 and miR-1014) in follicle cells reversed shortened cytoophidia in *C323a*-driven follicle cells; and (B) despite the proven ineffectiveness of *UAS*-miRNA constructs in germline cells, effects of miRNA overexpression by FCDs were

nonetheless capable of inducing morphological changes to macro-cytophidia of nurse cells. However, FNCC does not appear to be “two-way”. This was demonstrated through the overexpression of CytSh-miRNA miR-932, when driven by the germline specific driver *nos-GAL4*. Whereas cytophidia in nurse cells were accordingly truncated, the structures remained of average length in surrounding follicle-cells. Together, these outcomes show that whilst nurse cell cytophidia could be non-autonomously regulated, their formation in follicle cells are autonomous and unaffected by external stimuli.

Many questions were raised, in which the most pressing one is the component(s) transferred during FNCC. In plants, the plasticity of cellular products transfers such as miRNAs and proteins between neighbouring cells is well-documented (Marin-Gonzalez and Suarez-Lopez, 2012; Zambryski, 2004). Intercellular trafficking occurs through plasmodesmata, channels which are formed through the connective tissue connecting the plant cells (Brunkard, Runkel, and Zambryski, 2015). On the other hand, channel-mediated transfer of macromolecules rarely occur in animal systems. Phospholipid vesicles instead are often used to transfer RNAs and proteins to a nearby cell (Jose, 2015). Furthermore, though follicle cells are physically connected to outer nurse cells in the *Drosophila* egg chamber, ring canals are not known to form in between these two types of cells (Airoldi *et al.*, 2011). Nonetheless, evidence of molecule transfer from follicle to nurse cells do exist. The bacteria *Wolbacchia*, for example, can be transmitted from the somatic to germline stem cell in early-staged egg chambers of various *Drosophila* species. Unfortunately, how the process actually occurs is yet to be explained (Toomey *et al.*, 2013).

Such passive mechanisms of cell-to-cell communication (CCC) are restricted by molecule-size. We therefore hypothesize two scenarios to have most likely caused the non-cell autonomous regulation of nurse cell cytophidia observed here.

One is due to the transfer of excessive candidate miRNAs from follicle to nurse cells, where they go on to affect the same mRNA targets, thereby resulting in the same cytophidia phenotypes. The second scenario involves CTP molecules themselves. It is known that certain nucleotides are paramount in CCC as signaling molecules (Chen, Levy, and Lightman, 1995; Gründling and Lee, 2016), where much of their function is related to homeostasis maintenance and coordinating metabolic processes (Mediero and Cronstein, 2013; Meshkini, 2014). Moreover, metabolomics-centric studies have shown that the fine nucleotide molecule is much more frequently transported through ring canals and gap junctions than larger cellular components (Pitts and Simms, 1977; Subak-Sharpe, Burk, and Pitts, 1969). CTPsyn enzyme is allosterically regulated by CTP; we therefore reason that as miRNA overexpression upregulate or downregulate CTP level in follicle cells, the passive movement of these molecules across these two cell populations affects CTPsyn activity and eventually, inducing or reducing cytophidia formation. Our future work will entail nucleotide-movement tracking and quantification assays to assess the validity of this hypothesis, alongside the utilization of fly lines with mutations impairing the proper formation of ring canals, as well as any other types of cell-to-cell channels which may apply.

#### 4.2 CTPsyn is not directly regulated by the prime candidate miRNAs.

TargetScanFly-mediated target prediction analysis upon the 3'UTR of *CTPsynIsoC* assigned a total of just five potential miRNAs to the region, based on seed complementarity (Schnall-Levin *et al.*, 2010). Regardless, two of the prime candidates i.e. miR-975 and miR-932 were each predicted to have a direct binding site on *CTPsynIsoC*, though neither was conserved beyond the *Sophophora* subgenus. However, several outcomes of *in vitro* assays conducted within this study has led us to conclude that in reality, neither of these miRNAs may actually do so.

To ascertain availability of true *CTPsynIsoC* 3'UTR binding sites for any of the candidates, a single-miRNA overexpression construct was doubly-transfected alongside a plasmid carrying an *eGFP* gene with the 282-bp 3'UTR sequence of *CTPsynIsoC* attached to its end. Significant *eGFP* signal reduction compared to controls indicates that a miRNA might indeed have a compatible seed sequence along this region, and therefore could be a direct regulator of *CTPsynIsoC*. The results of this assay demonstrated that miR-975 and miR-1014, and not miR-932, are the ones that are most likely to regulate *CTPsynIsoC*. Its signal reductions were however minute, and *CTPsynIsoC* levels in all miRX-ov cell cultures were not affected. These clues suggest that even if any of these miRNAs were to able regulate the *CTPsynIsoC* gene *in vivo*, effects will be modest and non-significant.

Subsequent qPCR analysis of miR-975-overexpressing ovarian tissues quickly debunked its case as a canonical regulator of *CTPsynIsoC*. Its expression levels not only saw an upturn under such conditions, but the upregulation was significantly drastic. We are hereby more inclined to believe that though *CTPsyn* and cytoophidia formation truly do respond to miRNA-overexpression events, the gene itself is not directly regulated by the candidates under evaluation here. The naturally low expression levels of both miR-975 and miR-932 – as the two most likely to target *CTPsynIsoC* – only provides more support to this assumption. As a matter of fact, if

this is to be viewed in lieu to its poor targeting by known *D. melanogaster* miRNA families, it is not a stretch to say that *CTPsyn* may not be implicitly bound by any miRNAs at all.

Overall, the stringent algorithm of TargetScanFly listed only the potential interactions between five miRNAs and specific sequences within the 3'UTR region of *CTPsyn/soC* to be of any merit. It is important to note that in this case, only the canonical aspects of miRNA-based regulation are considered. For one, the traditionally accepted view has always been that miRNA action would often negatively affect the levels of its mRNA targets. However, this has been challenged, as several miRNA species are found to induce, rather than reduce genetic expression (Catalanotto, Cogoni, and Zardo, 2016; Ørom, Nielsen, and Lund, 2008; Place *et al.*, 2008). Additionally, emerging evidence over the past years has dictated that these small RNAs may assert its regulatory functions by binding to intronic, coding regions, and 5'UTR targets (Lytle, Yario, and Steitz, 2007; Qian *et al.*, 2016). *D. melanogaster* was found to contain these outlying binding sites too (Schnall-Levin *et al.*, 2010). Consequently, with the whole open-reading frame of *CTPsyn/soC* included for target prediction, thirteen miRNAs were identified as potential regulators of the gene. In the future, exploring these routes of *in silico* target prediction as well may be in the best of interests, so that no avenues are left unaddressed.

### 4.3 Influence of fat metabolism pathways in cytoophidia formation

The connections between cytoophidium and fat metabolism become clearer as we go through *in silico* target prediction alongside qPCR validation. This should be expected, given the role of CTP as the seed molecule of phospholipids (Kennedy and Weiss, 1956). Presented outcomes have led us to identify miR-932 and miR-1014 as the two candidates with the most obvious connections to fat metabolism pathways. Based on the expressional fluctuations of their potential targets, we believe that such demonstrated relationships may provide new insights in cytoophidia formation and regulation. These hypothesized pathways are represented by diagrams provided here as Supplementary Figures S2 and S3.

MiR-932 overexpression induces a severe reduction in *fitm* mRNA levels in both ovarian tissue and cell culture. The *D. melanogaster fat-storage inducing transmembrane protein* gene (*dme-fitm*) is homologue to the human *FIT2* gene, in which the protein can be found along the endoplasmic reticulum (ER) membrane (Kadereit *et al.*, 2008). *FIT2* acts by partitioning triglyceride (TAG) fatty acids from the ER and packing them into lipid-rich organelles known as lipid droplets (LD). This process occurs when there is a high level of fat within the cells (Guo *et al.*, 2009). Overexpression of *FIT2* increases LD numbers, whilst *FIT2*-knockdown reduces the accumulation of LDs rapidly. On the other hand, miR-1014 overexpression reduces *CdsA* levels. *CdsA* enzyme is crucial in the initiation of phospholipid synthesis, in which it catalyses the condensation of phosphatidic acid and CTP into the starting molecule i.e. cytidine diphosphate diacylglycerol (CDP-DAG) within phospholipid production (Liu *et al.*, 2014). We hypothesized that cytoophidia elongation may have occurred due to the depletion of *CdsA* from miR-1014 regulation: as CTP molecules are accumulating, they act on CTPsyn via a negative feedback mechanism (Aronow and Ullman, 1987). CTPsyn thus become inactivated and tether into filaments to avoid degradation, producing the elongated phenotype as observed Nevertheless,

what is most crucial here is the effect these events have on the diminishment of phospholipid metabolism, and what that ultimately means for other cellular processes.

For most organisms including *D. melanogaster*, carbohydrates often act as the primary source of energy. However, upon a prolonged starvation period, TAGs will be used in its stead (Owen *et al.*, 1998). To maintain internal TAG level, the plasma membrane breaks off into phospholipid-containing lysosomes within the cytosol, which are promptly rerouted and stored within LDs. These events explain why, in starved cells, not only are LDs larger, but greater numbers of them are found (Rambold, Cohen, and Lippincott-Schwartz, 2015).

It is known that whilst CTPsyn forms the bulk of its cytoophidia, they are not the sole component of the filament (Liu, 2011). The structure was discovered by the anti-Cup antibody, not anti-CTPsyn, indicating there is at least one non-CTPsyn constituent of the cytoophidia (Liu, 2010). Detectable gaps are also found on the macro-cytoophidia in the nurse cells, showing its non-homogenous property.

This is where starvation and subsequent fat metabolism may bear links to cytoophidia formation. Under miR-1014 overexpression, the downregulation of *CdsA* eventually depletes ovarian cells of their phospholipid reserves. This creates an environment mimicking starvation which, as aforementioned, culminates in the depletion of phospholipids to compensate for the loss of other fat resources. A previous study has found that elongated cytoophidia were formed in the brains of starved larvae, and at greater frequencies (Aughey and Liu, 2015). True enough, miR-1014-overexpressing egg chambers hold much longer macro-cytoophidia, with the occasional increment in numbers of micro-cytoophidia observed in follicle cells. The same study later showed that once larvae has been refed, cytoophidia disassembling occurred quickly. It can be said that this is mirrored in the truncation of cytoophidia under miR-932 excess: *Act5c-GAL4>UAS-miR932* tissues see much



reduced FITM protein levels, thus mimicking conditions of both high-fat food consumption and FIT2-knockdown (Miranda *et al.*, 2014).

*CTPsyn*/*soC* levels in both *Act5c-GAL4>UAS-miR932* and *Act5c-GAL4>UAS-miR1014* flies were already revealed to be undisturbed. This indicates that CTPsyn molecule availability is not the determining factor to modifications to cytoophidia length in either cases, but are artefacts of the polymerization and tethering processes. As explained beforehand, starvation and fat utilization leads to change in LD level is the most likely cause to a parallel change in cytoophidia behavior. Starvation dynamics explained above dictate that the factor most likely to be changing in parallel to these opposing displays of cytoophidia behaviour are LDs. Apart from lipid storage, these membrane-enclosed organelles have a demonstrated ability to contain and interact with numerous proteins such as histones and membrane-trafficking enzymes (Cermelli *et al.*, 2006). Droplet-recruitment also protects a protein from degradation (Welte, 2007); which is suspected to be one of the main objectives for CTPsyn-filamentation in the first place. Taken together, these are the reasons why we believe LDs to be a literal missing piece of the cytoophidium puzzle. Co-immunoprecipitation, TEM-visualization of tagged-TAG localization patterns, as well as generation and subsequent CTPsyn-centric immunostaining of tissues from *fitm*-knockout mutants, could be worthwhile endeavours towards figuring out whether this hypothesis holds true.

#### 4.4 Summarizing conclusions

Through the systematic utilization of follicle-cell, nurse-cell and ubiquitous drivers, an overexpression-based screening involving over 120 miRNAs has successfully identified a group of candidates which cause either the lengthening or truncation of cytoophidia in *dme*-egg chambers. Both miR-975 and miR-1014 are prime cytoophidia-elongating candidates. Phenotyping revealed that despite this shared trait, they go on to confer differential effects on egg chamber survival: whereas miR-975 overexpression doubles typical nurse cell numbers in a small number of egg chambers, miR-1014 significantly increased incidence of apoptosis instead. Conversely, prime candidates miR-190 and miR-932 only appeared to cause cytoophidia-shortening. As morphological changes to these filamentous structures appear little dependent on *CTPsyn* levels themselves, these observations together signify that rather than cytoophidia-dissociation, *CTPsyn* polymerization events may be a more useful indicator of major changes to the cellular 'normal'. Subsequent *in vitro* assays further revealed very low probabilities of any of the four prime candidates eliciting the cytoophidia-forming isoform of *CTPsyn* i.e. *CTPsynIsoC*, suggesting the participation of intermediary components. Whilst *in silico* prediction followed by qPCR validation of targets showed feasible *CTPsyn* connections for neither miR-190 nor miR-975, they uncovered the possibility of a deep-seated relationship between fat metabolism and cytoophidia formation, to miRNAs 932 and 1014. All-in-all, this study has successfully demonstrated the involvement of a small group of miRNAs in *CTPsyn* regulation, although it is highly likely that their roles in these cases are indirectly conferred.

## **Acknowledgement**

We would like to thank all our collaborators and colleagues for the discussion and the work conducted in this lab. This study was funded by the Fundamental Research Grant Scheme (203/PBIOLOGI/6711457). N.D. is funded by Yayasan Khazanah.

## 1 5.0 References

- 2 Airoidi, S. J., McLean, P. F., Shimada, Y., and Cooley, L. (2011). Intercellular protein movement in  
3 syncytial *Drosophila* follicle cells. *J Cell Sci*, *124*(Pt 23), 4077-4086. doi: 10.1242/jcs.090456
- 4 Aronow, B., and Ullman, B. (1987). In situ regulation of mammalian CTP synthetase by allosteric  
5 inhibition. *J Biol Chem*, *262*(11), 5106-5112.
- 6 Ashrafi, K. (2007). Obesity and the regulation of fat metabolism. *WormBook*, 1-20. doi:  
7 10.1895/wormbook.1.130.1
- 8 Aughey, G. N., Grice, S. J., and Liu, J.-L. (2016). The Interplay between Myc and CTP Synthase in  
9 *Drosophila*. *PLoS Genet*, *12*(2), e1005867. doi: 10.1371/journal.pgen.1005867
- 10 Aughey, G. N., Grice, S. J., Shen, Q. J., Xu, Y., Chang, C. C., Azzam, G., . . . Liu, J. L. (2014). Nucleotide  
11 synthesis is regulated by cytoophidium formation during neurodevelopment and adaptive  
12 metabolism. *Biol Open*, *3*(11), 1045-1056. doi: 10.1242/bio.201410165
- 13 Aughey, G. N., and Liu, J. L. (2015). Metabolic regulation via enzyme filamentation. *Crit Rev Biochem*  
14 *Mol Biol*, *51*(4), 282-293. doi: 10.3109/10409238.2016.1172555
- 15 Azzam, G., and Liu, J. L. (2013). Only one isoform of *Drosophila melanogaster* CTP synthase forms the  
16 cytoophidium. *PLoS Genet*, *9*(2), e1003256. doi: 10.1371/journal.pgen.1003256
- 17 Blackburn, G. M., Gait, M. J., Loakes, D., and Williams, D. M. (2006). *Nucleic Acids in Chemistry and*  
18 *Biology* (3 ed.). UK: Royal Society of Chemistry.
- 19 Brand, A. H., and Perrimon, N. (1993). Targeted gene expression as a means of altering cell fates and  
20 generating dominant phenotypes. *Development*, *118*(2), 401-415.
- 21 Brennecke, J., Hipfner, D. R., Stark, A., Russell, R. B., and Cohen, S. M. (2003). bantam encodes a  
22 developmentally regulated microRNA that controls cell proliferation and regulates the  
23 proapoptotic gene hid in *Drosophila*. *Cell*, *113*. doi: 10.1016/s0092-8674(03)00231-9
- 24 Brunkard, J. O., Runkel, A. M., and Zambryski, P. C. (2015). The cytosol must flow: intercellular  
25 transport through plasmodesmata. *Curr Opin Cell Biol*, *35*, 13-20. doi:  
26 10.1016/j.ceb.2015.03.003
- 27 Cabej, N. (2012). *Epigenetic Control of Reproduction*.
- 28 Catalanotto, C., Cogoni, C., and Zardo, G. (2016). MicroRNA in Control of Gene Expression: An  
29 Overview of Nuclear Functions. *International Journal of Molecular Sciences*, *17*(10), 1712. doi:  
30 10.3390/ijms17101712
- 31 Cermelli, S., Guo, Y., Gross, S. P., and Welte, M. A. (2006). The lipid-droplet proteome reveals that  
32 droplets are a protein-storage depot. *Curr Biol*, *16*(18), 1783-1795. doi:  
33 10.1016/j.cub.2006.07.062
- 34 Chen, K., Zhang, J., Tastan, O. Y., Deussen, Z. A., Siswick, M. Y., and Liu, J. L. (2011). Glutamine  
35 analogs promote cytoophidium assembly in human and *Drosophila* cells. *J Genet Genomics*,  
36 *38*(9), 391-402. doi: 10.1016/j.jgg.2011.08.004
- 37 Chen, Z. P., Levy, A., and Lightman, S. L. (1995). Nucleotides as extracellular signalling molecules. *J*  
38 *Neuroendocrinol*, *7*(2), 83-96.
- 39 Dang, C. V. (2012). Links between metabolism and cancer. *Genes Dev*, *26*(9), 877-890. doi:  
40 10.1101/gad.189365.112
- 41 Duffy, J. B. (2002). GAL4 system in *Drosophila*: a fly geneticist's Swiss army knife. *Genesis*, *34*(1-2), 1-  
42 15. doi: 10.1002/gene.10150
- 43 Gelbart, W. M., Crosby, M., Matthews, B., Rindone, W. P., Chillemi, J., Russo Twombly, S., . . .  
44 Whitfield, E. (1997). FlyBase: a *Drosophila* database. The FlyBase consortium. *Nucleic Acids*  
45 *Res*, *25*. doi: 10.1093/nar/25.1.63
- 46 Gelbart, W. M., and Emmert, D. B. (2013). FlyBase High Throughput Expression Pattern Data.
- 47 Grimson, A., Farh, K. K.-H., Johnston, W. K., Garrett-Engle, P., Lim, L. P., and Bartel, D. P. (2007).  
48 MicroRNA Targeting Specificity in Mammals: Determinants beyond Seed Pairing. *Mol Cell*,  
49 *27*(1), 91-105. doi: <https://doi.org/10.1016/j.molcel.2007.06.017>
- 50 Gründling, A., and Lee, V. T. (2016). Old concepts, new molecules and current approaches applied to  
51 the bacterial nucleotide signalling field. *Philosophical Transactions of the Royal Society B:*  
52 *Biological Sciences*, *371*(1707).
- 53 Guo, Y., Cordes, K. R., Farese, R. V., and Walther, T. C. (2009). Lipid droplets at a glance. *J Cell Sci*,  
54 *122*(6), 749.

- 55 Hara, C., Morishita, K., Takayanagi-Kiya, S., Mikami, A., Uchino, K., Sakurai, T., . . . Kiya, T. (2017).  
56 Refinement of ectopic protein expression through the GAL4/UAS system in *Bombyx mori*:  
57 application to behavioral and developmental studies. *Scientific Reports*, *7*(1), 11795. doi:  
58 10.1038/s41598-017-12102-2
- 59 Hrdlicka, L., Gibson, M., Kiger, A., Micchelli, C., Schober, M., Schock, F., and Perrimon, N. (2002).  
60 Analysis of twenty-four Gal4 lines in *Drosophila melanogaster*. *Genesis*, *34*(1-2), 51-57. doi:  
61 10.1002/gene.10125
- 62 Ingerson-Mahar, M., Briegel, A., Werner, J. N., Jensen, G. J., and Gitai, Z. (2010). The metabolic  
63 enzyme CTP synthase forms cytoskeletal filaments. *Nat Cell Biol*, *12*(8), 739-746. doi:  
64 10.1038/ncb2087
- 65 Jenkins, A. B., McCaffery, J. M., and Van Doren, M. (2003). *Drosophila* E-cadherin is essential for  
66 proper germ cell-soma interaction during gonad morphogenesis. *Development*, *130*(18),  
67 4417-4426.
- 68 Jin, H., Kim, V. N., and Hyun, S. (2012). Conserved microRNA miR-8 controls body size in response to  
69 steroid signaling in *Drosophila*. *Genes Dev*, *26*(13), 1427-1432. doi: 10.1101/gad.192872.112
- 70 Jose, A. M. (2015). Movement of regulatory RNA between animal cells. *Genesis*, *53*(7), 395-416. doi:  
71 10.1002/dvg.22871
- 72 Kadereit, B., Kumar, P., Wang, W. J., Miranda, D., Snapp, E. L., Severina, N., . . . Silver, D. L. (2008).  
73 Evolutionarily conserved gene family important for fat storage. *Proc Natl Acad Sci U S A*,  
74 *105*(1), 94-99. doi: 10.1073/pnas.0708579105
- 75 Kammen, H. O., and Hurlbert, R. B. (1959). The formation of cytidine nucleotides and RNA cytosine  
76 from orotic acid by the Novikoff tumor *in vitro*. *Cancer Res*, *19*(6, Part 1), 654-663.
- 77 Karres, J. S., Hilgers, V., Carrera, I., Treisman, J., and Cohen, S. M. (2007). The conserved microRNA  
78 miR-8 tunes atrophin levels to prevent neurodegeneration in *Drosophila*. *Cell*, *131*(1), 136-  
79 145. doi: 10.1016/j.cell.2007.09.020
- 80 Kennedy, E. P., and Weiss, S. B. (1956). The function of cytidine coenzymes in the biosynthesis of  
81 phospholipides. *J Biol Chem*, *222*(1), 193-214.
- 82 Kheradpour, P., Stark, A., Roy, S., and Kellis, M. (2007). Reliable prediction of regulator targets using  
83 12 *Drosophila* genomes. *Genome Res*, *17*(12), 1919-1931. doi: 10.1101/gr.7090407
- 84 Kramer, J. M., and Staveley, B. E. (2003). GAL4 causes developmental defects and apoptosis when  
85 expressed in the developing eye of *Drosophila melanogaster*. *Genetics and Molecular*  
86 *Research*, *2* (1), 43-47.
- 87 Lai, E. C. (2002). Micro RNAs are complementary to 3' UTR sequence motifs that mediate negative  
88 post-transcriptional regulation. *Nat Genet*, *30*(4), 363-364. doi: 10.1038/ng865
- 89 Lewis, B. P., Burge, C. B., and Bartel, D. P. (2005). Conserved seed pairing, often flanked by  
90 adenosines, indicates that thousands of human genes are microRNA targets. *Cell*, *120*(1), 15-  
91 20. doi: 10.1016/j.cell.2004.12.035
- 92 Li, Y., Wang, F., Lee, J. A., and Gao, F. B. (2006). MicroRNA-9a ensures the precise specification of  
93 sensory organ precursors in *Drosophila*. *Genes Dev*, *20*(20), 2793-2805. doi:  
94 10.1101/gad.1466306
- 95 Lieberman, I. (1956). Enzymatic amination of uridine triphosphate to cytidine triphosphate. *J Biol*  
96 *Chem*, *222*(2), 765-775.
- 97 Liu, J. L. (2010). Intracellular compartmentation of CTP synthase in *Drosophila*. *J Genet Genomics*,  
98 *37*(5), 281-296. doi: 10.1016/s1673-8527(09)60046-1
- 99 Liu, J. L. (2011). The enigmatic cytoophidium: compartmentation of CTP synthase via filament  
100 formation. *Bioessays*, *33*(3), 159-164. doi: 10.1002/bies.201000129
- 101 Liu, N., Landreh, M., Cao, K., Abe, M., Hendriks, G. J., Kennerdell, J. R., . . . Bonini, N. M. (2012). The  
102 microRNA miR-34 modulates ageing and neurodegeneration in *Drosophila*. *Nature*,  
103 *482*(7386), 519-523. doi: 10.1038/nature10810
- 104 Liu, Y., Wang, W., Shui, G., and Huang, X. (2014). CDP-Diacylglycerol Synthetase Coordinates Cell  
105 Growth and Fat Storage through Phosphatidylinositol Metabolism and the Insulin Pathway.  
106 *PLoS Genet*, *10*(3), e1004172. doi: 10.1371/journal.pgen.1004172
- 107 Lynch, E. M., Hicks, D. R., Shepherd, M., Endrizzi, J. A., Maker, A., Hansen, J. M., . . . Baldwin, E. P.  
108 (2017). Human CTP synthase filament structure reveals the active enzyme conformation.  
109 *Development*, *144*(6), 507-514. doi: 10.1038/nsmb.3407

- 110 Lytle, J. R., Yario, T. A., and Steitz, J. A. (2007). Target mRNAs are repressed as efficiently by  
111 microRNA-binding sites in the 5' UTR as in the 3' UTR. *Proc Natl Acad Sci U S A*, *104*(23),  
112 9667-9672. doi: 10.1073/pnas.0703820104
- 113 Mahowald, A. P., and Hardy, P. A. (1985). Genetics of Drosophila Embryogenesis. *Annual Review of*  
114 *Genetics*, *19*(1), 149-177. doi: 10.1146/annurev.ge.19.120185.001053
- 115 Manseau, L., Baradaran, A., Brower, D., Budhu, A., Elefant, F., Phan, H., . . . Kaiser, K. (1997). GAL4  
116 enhancer traps expressed in the embryo, larval brain, imaginal discs, and ovary of Drosophila.  
117 *Developmental Dynamics*, *209*(3), 310-322.
- 118 Marco, A., Ninova, M., Ronshaugen, M., and Griffiths-Jones, S. (2013). Clusters of microRNAs emerge  
119 by new hairpins in existing transcripts. *Nucleic Acids Res*, *41*(16), 7745-7752. doi:  
120 10.1093/nar/gkt534
- 121 Marin-Gonzalez, E., and Suarez-Lopez, P. (2012). "And yet it moves": cell-to-cell and long-distance  
122 signaling by plant microRNAs. *Plant Sci*, *196*, 18-30. doi: 10.1016/j.plantsci.2012.07.009
- 123 Mediero, A., and Cronstein, B. N. (2013). Adenosine and Bone Metabolism. *Trends in endocrinology*  
124 *and metabolism: TEM*, *24*(6), 290-300. doi: 10.1016/j.tem.2013.02.001
- 125 Meshkini, A. (2014). Fine-tuning of the cellular signaling pathways by intracellular GTP levels. *Cell*  
126 *Biochem Biophys*, *70*(1), 27-32. doi: 10.1007/s12013-014-9897-4
- 127 Miranda, D. A., Kim, J. H., Nguyen, L. N., Cheng, W., Tan, B. C., Goh, V. J., . . . Silver, D. L. (2014). Fat  
128 storage-inducing transmembrane protein 2 is required for normal fat storage in adipose  
129 tissue. *J Biol Chem*, *289*(14), 9560-9572. doi: 10.1074/jbc.M114.547687
- 130 Noree, C., Sato, B. K., Broyer, R. M., and Wilhelm, J. E. (2010). Identification of novel filament-  
131 forming proteins in *Saccharomyces cerevisiae* and *Drosophila melanogaster*. *J Cell Biol*,  
132 *190*(4), 541-551. doi: 10.1083/jcb.201003001
- 133 Ørom, U. A., Nielsen, F. C., and Lund, A. H. (2008). MicroRNA-10a Binds the 5'UTR of Ribosomal  
134 Protein mRNAs and Enhances Their Translation. *Mol Cell*, *30*(4), 460-471. doi:  
135 <https://doi.org/10.1016/j.molcel.2008.05.001>
- 136 Owen, O. E., Smalley, K. J., D'Alessio, D. A., Mozzoli, M. A., and Dawson, E. K. (1998). Protein, fat, and  
137 carbohydrate requirements during starvation: anaplerosis and cataplerosis. *Am J Clin Nutr*,  
138 *68*(1), 12-34. doi: 10.1093/ajcn/68.1.12
- 139 Perrimon, N. (1997). [FBrf0093306, personal communication from N. Perrimon of Harvard  
140 University].
- 141 Pitts, J. D., and Simms, J. W. (1977). Permeability of junctions between animal cells: Intercellular  
142 transfer of nucleotides but not of macromolecules. *Exp Cell Res*, *104*(1), 153-163. doi:  
143 [https://doi.org/10.1016/0014-4827\(77\)90078-7](https://doi.org/10.1016/0014-4827(77)90078-7)
- 144 Place, R. F., Li, L.-C., Pookot, D., Noonan, E. J., and Dahiya, R. (2008). MicroRNA-373 induces  
145 expression of genes with complementary promoter sequences. *Proceedings of the National*  
146 *Academy of Sciences*, *105*(5), 1608.
- 147 Qian, J., Tu, R., Yuan, L., and Xie, W. (2016). *Intronic miR-932 targets the coding region of its host*  
148 *gene, Drosophila neuroligin2* (Vol. 344).
- 149 Rambold, A. S., Cohen, S., and Lippincott-Schwartz, J. (2015). Fatty acid trafficking in starved cells:  
150 regulation by lipid droplet lipolysis, autophagy, and mitochondrial fusion dynamics. *Dev Cell*,  
151 *32*(6), 678-692. doi: 10.1016/j.devcel.2015.01.029
- 152 Rezaval, C., Werbajh, S., and Ceriani, M. F. (2007). Neuronal death in Drosophila triggered by GAL4  
153 accumulation. *Eur J Neurosci*, *25*(3), 683-694. doi: 10.1111/j.1460-9568.2007.05317.x
- 154 Ryazansky, S. S., Gvozdev, V. A., and Berezikov, E. (2011). Evidence for post-transcriptional regulation  
155 of clustered microRNAs in Drosophila. *BMC Genomics*, *12*, 371-371. doi: 10.1186/1471-2164-  
156 12-371
- 157 Schertel, C., Rutishauser, T., Förstemann, K., and Basler, K. (2012). Functional Characterization of  
158 Drosophila microRNAs by a Novel *in vivo* Library. *Genetics*, *192*(4), 1543-1552. doi:  
159 10.1534/genetics.112.145383
- 160 Schnall-Levin, M., Zhao, Y., Perrimon, N., and Berger, B. (2010). Conserved microRNA targeting in  
161 Drosophila is as widespread in coding regions as in 3'UTRs. *Proc Natl Acad Sci U S A*, *107*(36),  
162 15751-15756. doi: 10.1073/pnas.1006172107

- 163 Schnurr, M. E., Yin, Y., and Scott, G. R. (2014). Temperature during embryonic development has  
164 persistent effects on metabolic enzymes in the muscle of zebrafish. *J Exp Biol*, 217(Pt 8),  
165 1370-1380. doi: 10.1242/jeb.094037
- 166 Stochlic, T. I., Stavrides, K. P., Thomas, S. V., Nicolas, E., O'Reilly, A. M., and Peterson, J. R. (2014).  
167 Ack kinase regulates CTP synthase filaments during *Drosophila* oogenesis. *EMBO Rep*, 15(11),  
168 1184-1191. doi: 10.15252/embr.201438688
- 169 Subak-Sharpe, H., BÜRk, R. R., and Pitts, J. D. (1969). Metabolic Co-Operation Between Biochemically  
170 Marked Mammalian Cells in Tissue Culture. *J Cell Sci*, 4(2), 353.
- 171 Toomey, M. E., Panaram, K., Fast, E. M., Beatty, C., and Frydman, H. M. (2013). Evolutionarily  
172 conserved Wolbachia-encoded factors control pattern of stem-cell niche tropism in  
173 *Drosophila* ovaries and favor infection. *Proceedings of the National Academy of Sciences*,  
174 110(26), 10788.
- 175 Tuck, M. L. (1990). Metabolic considerations in hypertension. *Am J Hypertens*, 3(12 Pt 2), 355S-365S.
- 176 UToronto, R. (2017). Fixing Cells with Paraformaldehyde (PFA) for Flow Cytometry. Online resource  
177 material extracted from <http://flowcytometry.utoronto.ca/>, updated last February 2016
- 178 Varghese, J., and Cohen, S. M. (2007). microRNA miR-14 acts to modulate a positive autoregulatory  
179 loop controlling steroid hormone signaling in *Drosophila*. *Genes Dev*, 21(18), 2277-2282. doi:  
180 10.1101/gad.439807
- 181 Welte, M. A. (2007). Proteins under new management: lipid droplets deliver. *Trends Cell Biol*, 17(8),  
182 363-369. doi: 10.1016/j.tcb.2007.06.004
- 183 Yang, W. L., Bruno, M. E., and Carman, G. M. (1996). Regulation of yeast CTP synthetase activity by  
184 protein kinase C. *J Biol Chem*, 271(19), 11113-11119.
- 185 Zambryski, P. (2004). Cell-to-cell transport of proteins and fluorescent tracers via plasmodesmata  
186 during plant development. *J Cell Biol*, 164(2), 165-168. doi: 10.1083/jcb.200310048

187

188

## 189 In-text Figures and Tables

190 **Figure 1: Driver-GAL4 specific reference phenotypes.** Genotypes of ovaries displayed are as indicated  
191 within side panels; top panels indicate immunostained proteins. CTPsyn form cytophidia. Here, macro-  
192 cytophidia are indicated by purple arrows, and micro-cytophidia are indicated by yellow arrows. In B and  
193 C, where truncation of the structure has occurred, they may appear as punctuates instead of filaments. All  
194 scale bars represent 40µm. (A) shows cytophidia as they appear in wild-type Oregon-R, presumed to be  
195 free of introduced constructs; (B and C) The follicle cell driver (FCD) *C323a-GAL4*, when crossed to Oregon-  
196 R, shortened cytophidia in both follicle and nurse cells, and in egg chambers of various stages. (D and E)  
197 *T155-GAL4*, an alternative FCD, also truncates cytophidia, but only in nurse cells. (F and G) Cytophidia  
198 within germline-specific driver *nos-GAL4* expressing ovaries are unaffected. (H) Cytophidia in ubiquitous  
199 *Act5c-GAL4* expressing ovaries are slightly shorter than average.

200

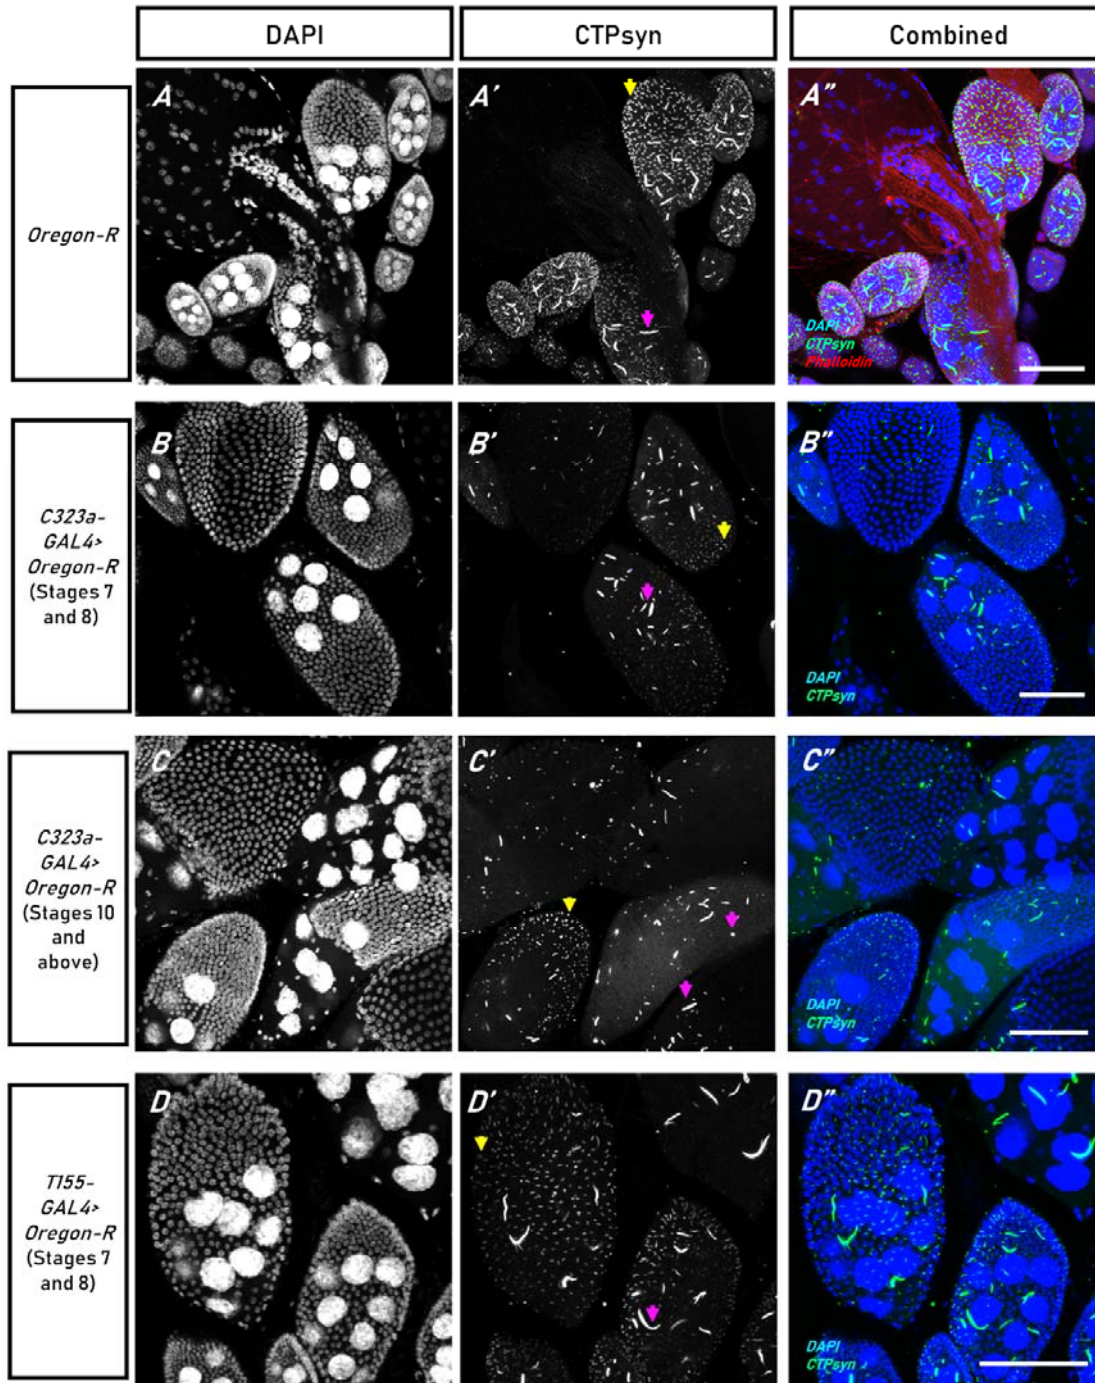

201



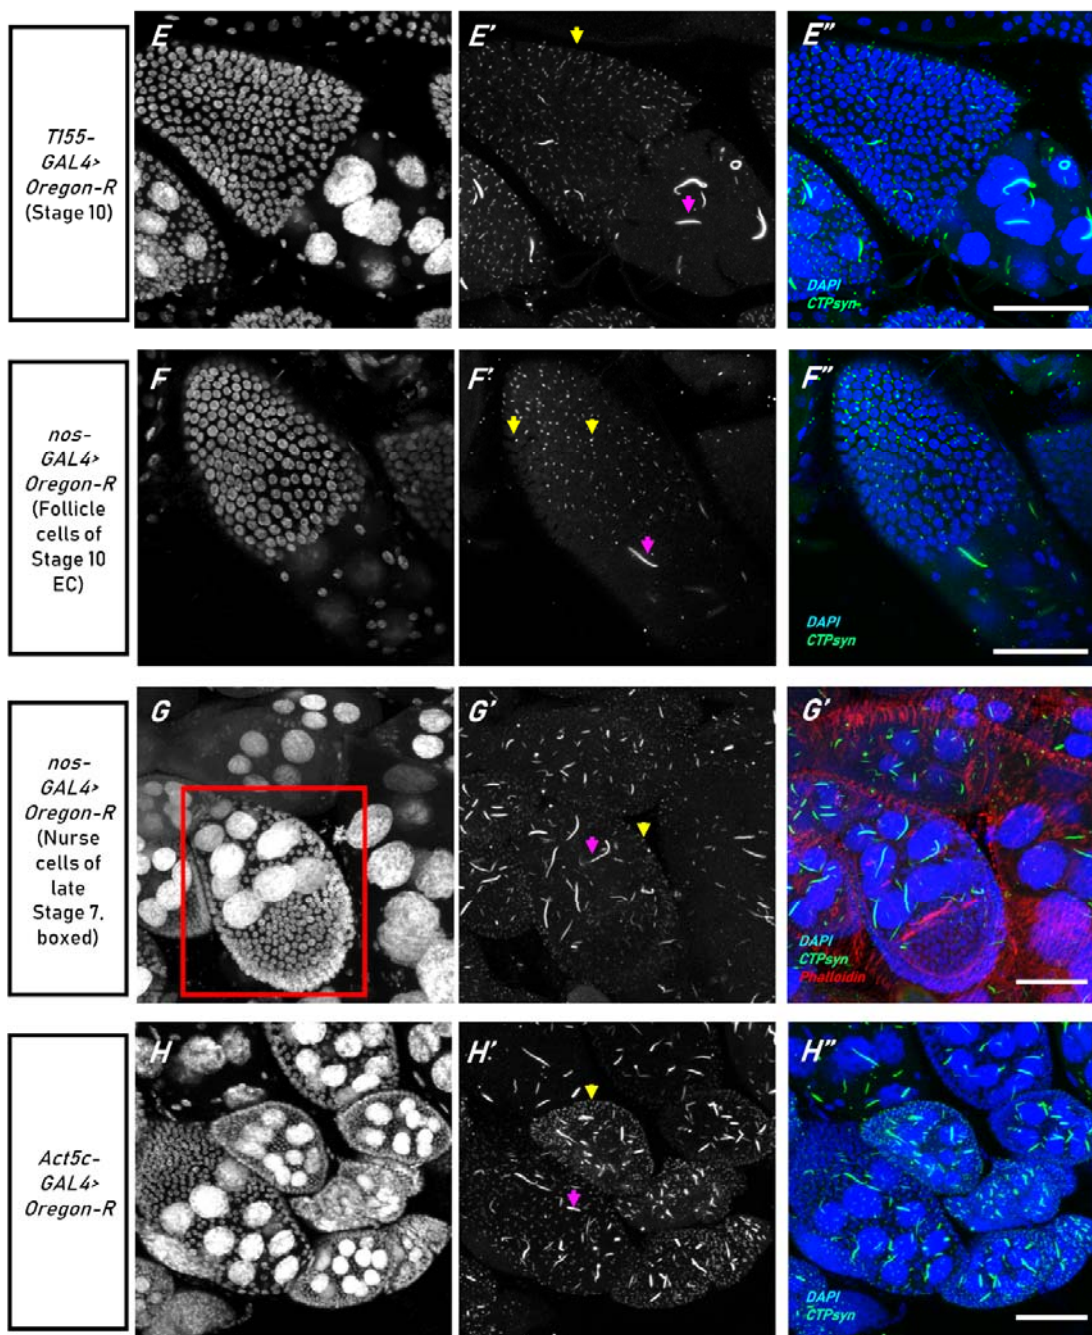

Table 1: **Summary of expression of miRNA candidates and its characteristics under different drivers, and within different constructs.** The candidates for each category are arranged in order of priority. miRNAs marked with an asterisk (\*) are further shortlisted as prime candidates.

| Effect                    | <i>dme-miR</i> | with <i>FCD-GAL4</i>              | with <i>nos-GAL4</i>              | with <i>Act5c-GAL4</i>                              | Redundancy i.e. performance across all available lines                                                                                                                                                                                                                                          |
|---------------------------|----------------|-----------------------------------|-----------------------------------|-----------------------------------------------------|-------------------------------------------------------------------------------------------------------------------------------------------------------------------------------------------------------------------------------------------------------------------------------------------------|
| <b>Elongating (CytEI)</b> | <b>975*</b>    | Yes, highly consistent and strong | NA                                | Yes, high penetrance i.e. >75% of egg chambers      | Nine lines carry miR-975. Elongates best on its own (#60663, #3016 and #3026) or in lines with miR-976/977 (#116509, #60634 and 60635). Attenuated when in a line together with miR-4966 (#41223)                                                                                               |
|                           | <b>1014*</b>   | Yes, highly consistent and strong | NA                                | Yes, high penetrance i.e. >75% of egg chambers      | Three lines carry miR-1014. Elongates with consistency, but strongest with one line in particular (#3071). Cause higher numbers of cell death                                                                                                                                                   |
|                           | <b>276a</b>    | Yes, but not consistent           | Yes, but not obvious from control | Yes, but lower penetrance i.e. <40% of egg chambers | Five lines carry miR-276a. Rather iffy with <i>FCD</i> but lengthening effects considerably improved under <i>nos-GAL4</i> . Low penetrance in egg chambers under <i>Act5c</i>                                                                                                                  |
|                           | <b>10</b>      | Yes, but not consistent           | NA                                | Yes, but low penetrance i.e. <25% egg chambers      | Two lines carry miR-969. Most obvious effect with #3108, i.e. non-CyO line., but with a TM3 balancer chromosome. Low penetrance often coincides with low survival i.e. confer a certain degree of lethality under <i>Act5c</i>                                                                  |
|                           | <b>988</b>     | Yes, but not consistent           | NA                                | Yes                                                 | Two lines carry miR-988. Neither assert greater effects than the other. Inconsistent with <i>FCD</i>                                                                                                                                                                                            |
|                           | <b>8</b>       | Yes, but not consistent           | NA                                | Yes                                                 | Two lines carry miR-988. Neither assert greater effects than the other. Weak with <i>FCD</i>                                                                                                                                                                                                    |
|                           | <b>969</b>     | Yes, but not consistent           | NA                                | Yes, but not consistently                           | Three lines carry miR-969. Most obvious effect with #3015, i.e. non-CyO line                                                                                                                                                                                                                    |
|                           | <b>193</b>     | Yes, but not consistent           | Yes                               | Yes, medium low penetrance at ~35%                  | Three lines carry miR-193, all UASp. Under <i>FCD</i> , very little lengthening was discernible; under <i>nos</i> , the elongation of cytophidia became obvious. However, penetrance was unsatisfactory with <i>Act5c</i> , and elongation is typically observed alongside heightened lethality |

|                           |                         |                                                                     |                                                                      |                                                                             |                                                                                                                                                                                                                                                                     |
|---------------------------|-------------------------|---------------------------------------------------------------------|----------------------------------------------------------------------|-----------------------------------------------------------------------------|---------------------------------------------------------------------------------------------------------------------------------------------------------------------------------------------------------------------------------------------------------------------|
|                           | <b>1001</b>             | Yes, but barely                                                     | NA                                                                   | Yes, med-penetrance but not all carrier lines produce elongated cytoophidia | One line carries miR-1001. Did not show any out of the ordinary effects under <i>FCD</i> , but the phenotype appears with <i>Act5c</i> . Lack of a second redundant line disables further steps towards confirmation to be taken                                    |
| <b>Shortening (CytSh)</b> | <b>190*</b>             | Yes, consistently and highly penetrant                              | Yes                                                                  | Yes                                                                         | Four lines carry miR-190. All four causes shortening to similar degrees. Despite previous reports of its overexpression being lethal, none of the four appear to actually cause a reduction in fitness amongst offspring                                            |
|                           | <b>932*</b>             | Yes, consistently and highly penetrant                              | Yes                                                                  | Yes, but viability is compromised                                           | Three lines carry miR-932. All induce cytoophidia shortening, to similar effects; one line in particular (#3038) reduces viability of F1s considerably                                                                                                              |
|                           | <b>87</b>               | Yes in nurse cells but not in follicle cells                        | Yes; mild (#116431, #3112, #59874) to strong (#116430 and 3119)      | Yes, but medium penetrance of ~45%                                          | Five lines carry miR-87. Strongest effects when line #3119 is used in crosses. The others assert noticeably milder effects                                                                                                                                          |
|                           | <b>2a-2, 2a-1, 2b-2</b> | Yes in both nurse and follicle cells, but poor penetrance i.e. ~20% | Yes, strongly with #3118 and #59849, but medium penetrance i.e. ~45% | Yes, but very low penetrance i.e. ~15%, with compromised viability          | Five lines carry this cluster construct. Initially excluded but upon observing their effects in <i>nos</i> crosses became a CytSh-candidate. However, penetrance is often unsatisfactory, which shows that the effects of this cluster's overexpression is volatile |
|                           | <b>316</b>              | Yes, but not very strongly in either follicle nor nurse cells       | NA                                                                   | Yes, but low penetrance i.e. ~20%                                           | Two lines carry miR-316. Effects are only mild, with neither construct exceedingly performing the other                                                                                                                                                             |
|                           | <b>983-1</b>            | Yes in nurse cells but not as obviously in follicle cells           | No                                                                   | NA (Act5c-lethal)                                                           | Two lines carry miR-983-1. In #41217, it is within a cluster with miR-984 and its miR-isoform, 983-2. Shortening only caused when miR-983-1 is singularly overexpressed, i.e. in crosses with line #41194                                                           |

**Figure 2: Characteristics of prime candidate miRNA genes.** Prime CytEI-miRNAs: (A) miR-975 is encoded in a cluster alongside miR-976 and miR-977, but is additionally flanked within close proximity by miR-4966 and miR-978. (B) miR-1014 is an intronic gene to salt. Prime CytSh-miRNAs: (C) The gene locus of miR-190 is found within the rhea gene. (D) miR-932 is also intronic, found within the ORF of Nlg2.

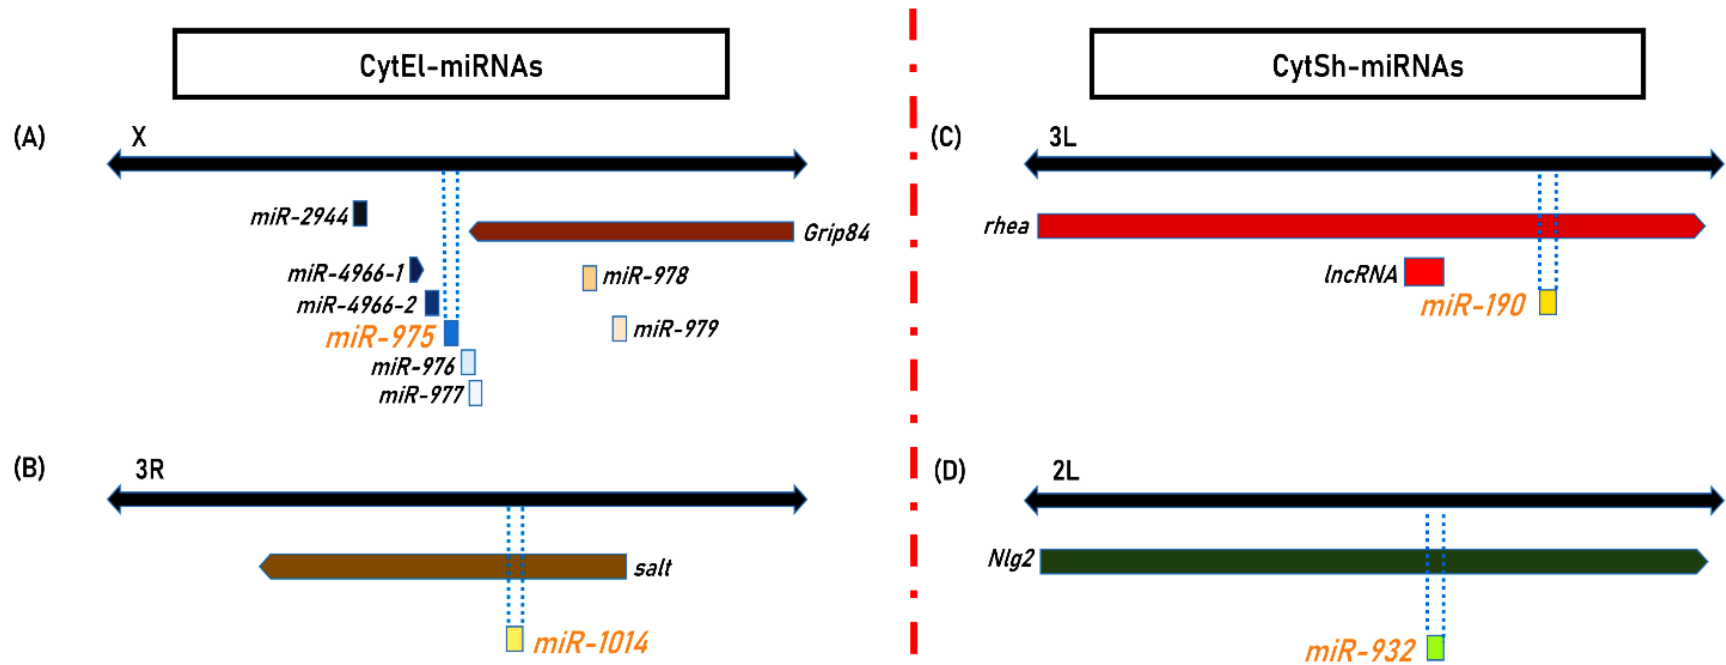

**Figure 3: Prime CytEI-miRNA, miR-975, consistently elongates cytoophidia when overexpressed.** In (A to D), its effects appeared driver and construct independent. Lengthening, here indicated by purple arrows, is clear in follicle as well as nurse cells, despite all miR-975-containing constructs being UAS-exclusive. In (E), the only instance where miR-975 caused elongation was not palpable was when it was encoded together with miR-4966. However, when miR-975 is alone ubiquitously expressed by Act-GAL4 driver, the doubling of nurse-cell nuclei can occasionally be seen (F, red boxed egg chamber). Genotypes are indicated by side panels, as driver>miR-X. All scale bars represent 40µm.

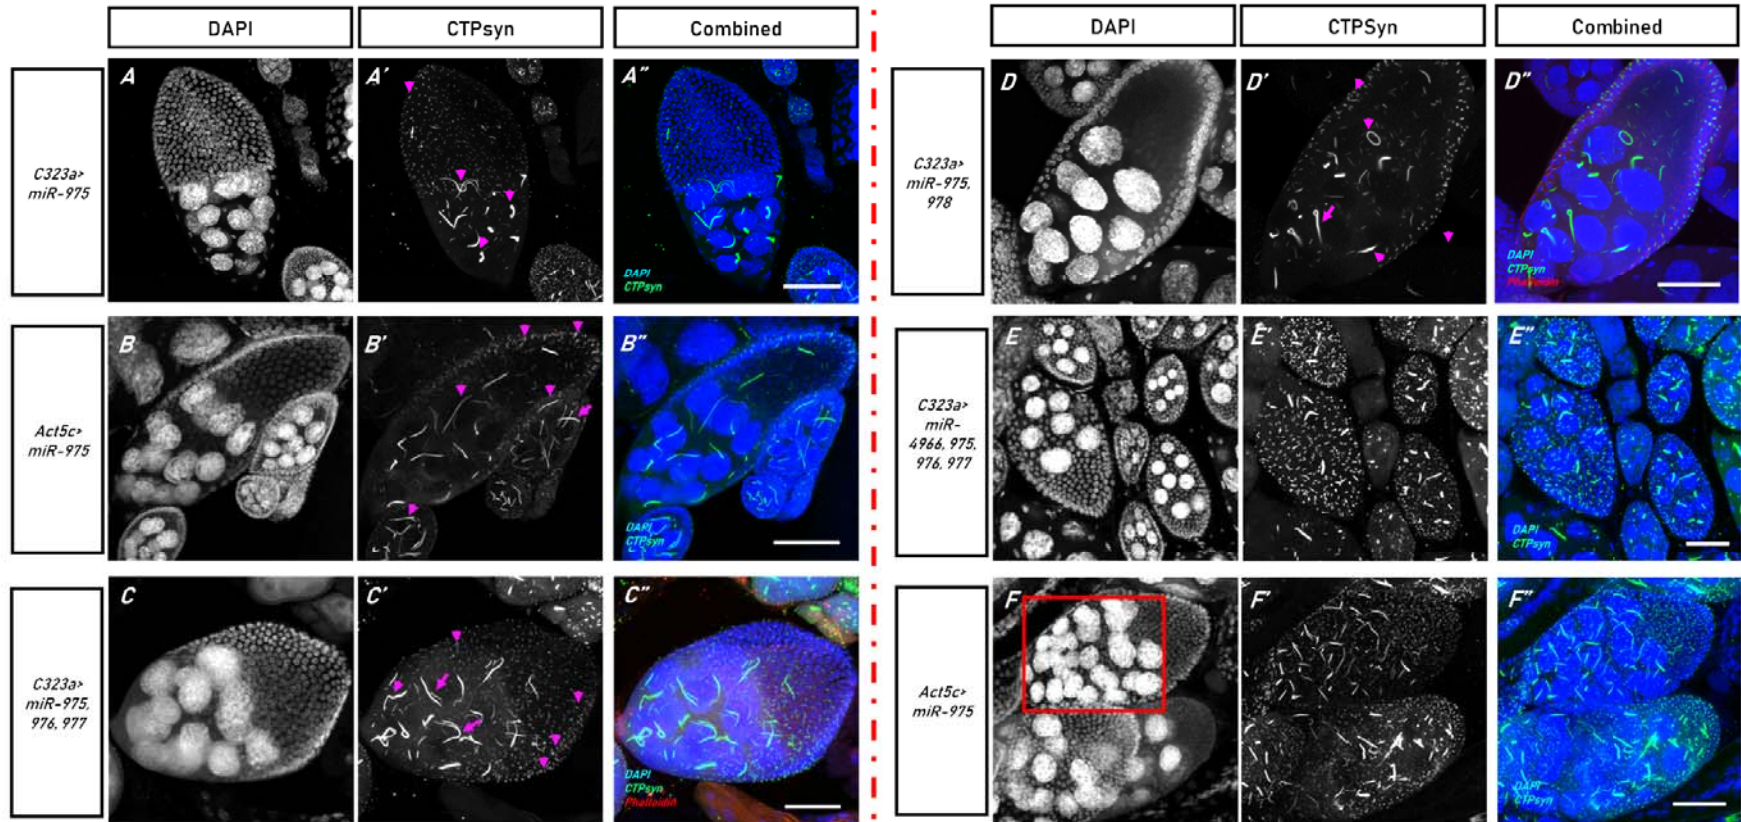

**Figure 4: Prime CytEI-miRNA, miR-1014, elongates cytoophidia when overexpressed, but also increases incidence of cell-death.** In (A), miR-1014 is driven by an FCD; in (B), it is driven by the ubiquitous driver *Act5c*. Although all miR-1014 lines are capable of inducing cytoophidia lengthening, this phenotype was most obvious in F1s from crosses with IMCB #3071 in (C), suggesting that severity may be construct-dependent. However, this miRNA's overexpression significantly increased the frequency of apoptotic egg chambers in comparison to controls and fellow CytEI-miRNA, miR-975 (red-boxed in D). Purple arrows indicate elongated cytoophidia. Genotypes are indicated by side panels, as driver>miR-1014. All scale bars represent 40µm.

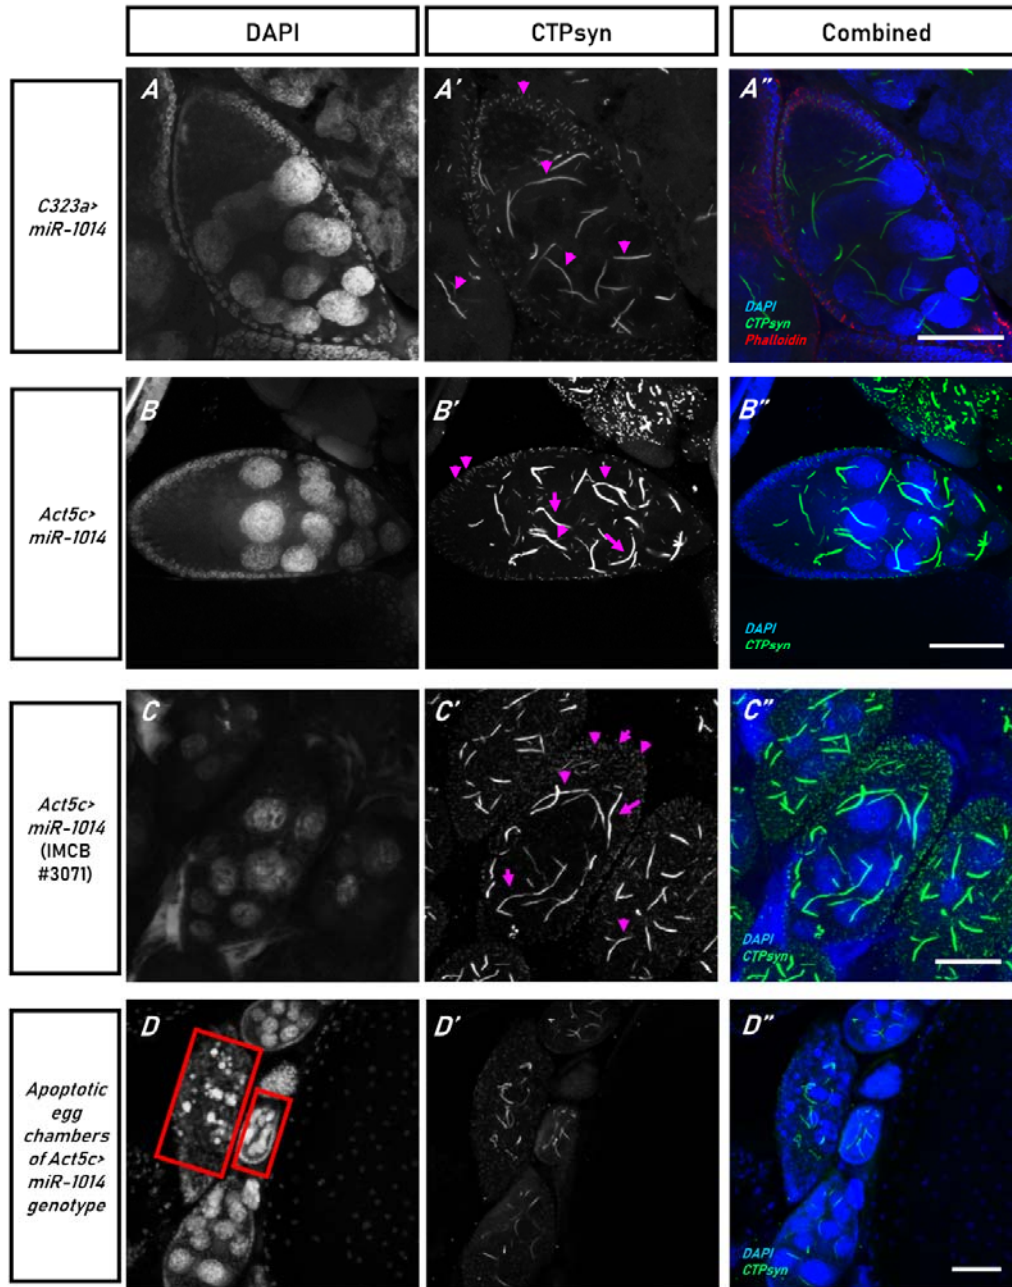

**Figure 5: Prime CytSh-miRNA, miR-190, shortens cytoophidia when overexpressed.** Cytoophidia truncation appears due to miR-190 overexpression regardless of construct and chromosomal insertion point, but its phenotype is certainly driver-dependent. In (A), (C) and (E), the UAS-miR190 transgene was incorporated into parental chromosome 2; while in (B), (D) and (F), the UAS-miR190 transgene was incorporated into the parental chromosome 3. Parental driver-lines are specified by side panels. Truncated cytoophidia i.e. a positive miR-190-overexpression phenotype is indicated by yellow arrows. All scale bars represent 40µm.

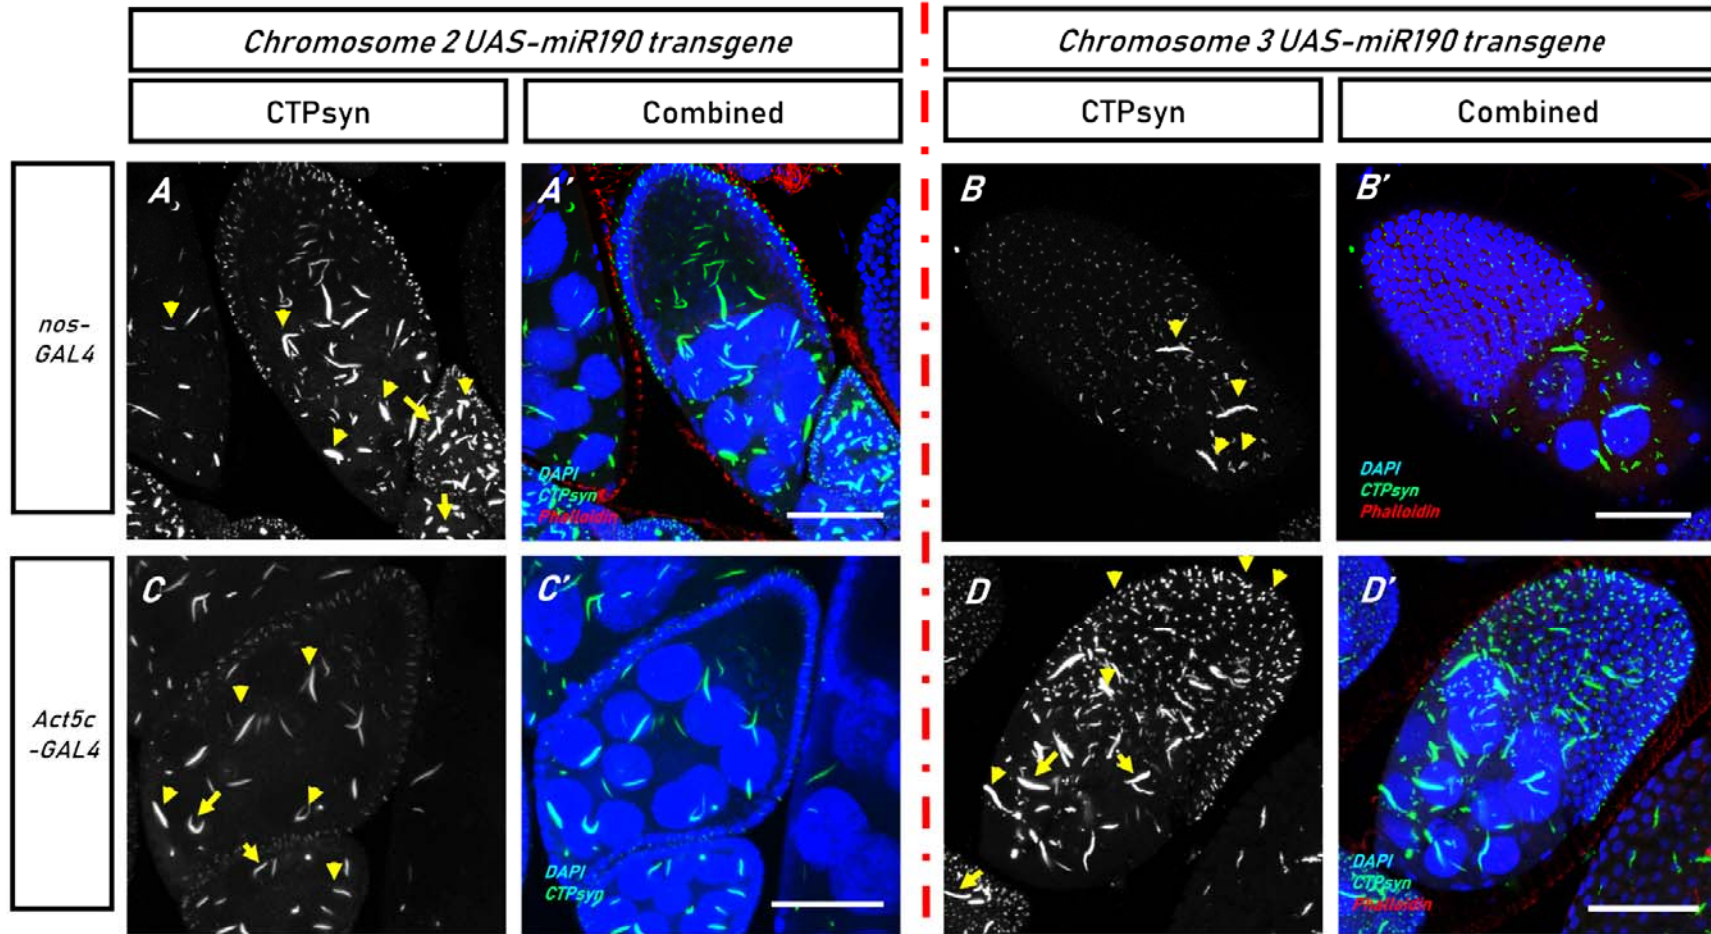

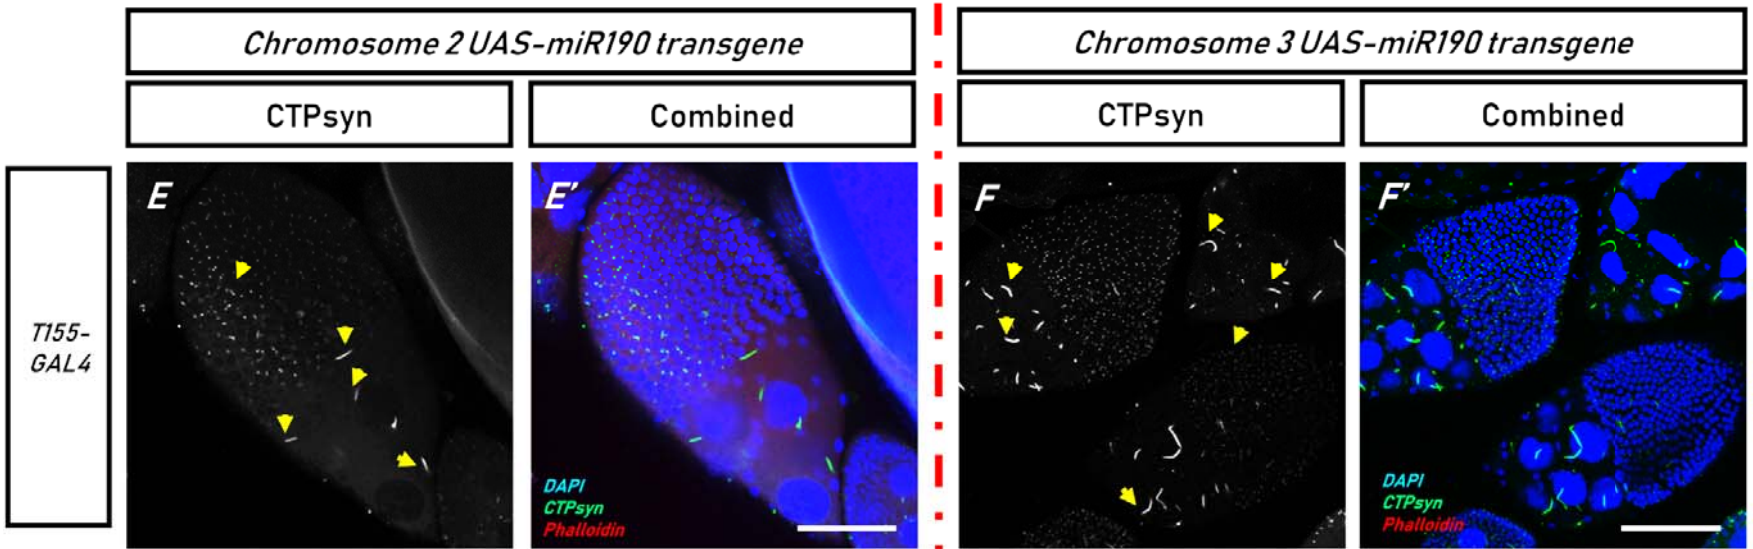



**Figure 6: Another CytSh-miRNA, miR-932, shortens cytoophidia when overexpressed.** Like miR-190, cytoophidia-shortening phenotype by miR-932 is driver-dependent. In (A) to (D), expression is driven by nos-GAL4, Act5c-GAL4 and each of the FCD-GAL4 drivers, respectively. Effects were considerably consistent; however, in transgenic line IMCB #3038 (UAS-miR932), highly-dense cytoophidia was observed alongside shortened ones in nurse cells (indicated by red arrows in (E)). This indicates that in some instances, different outcomes may be expected due to differences in constructs. Shortened cytoophidia are indicated by yellow arrows. Genotypes are indicated by side panels. All scale bars represent 40µm.

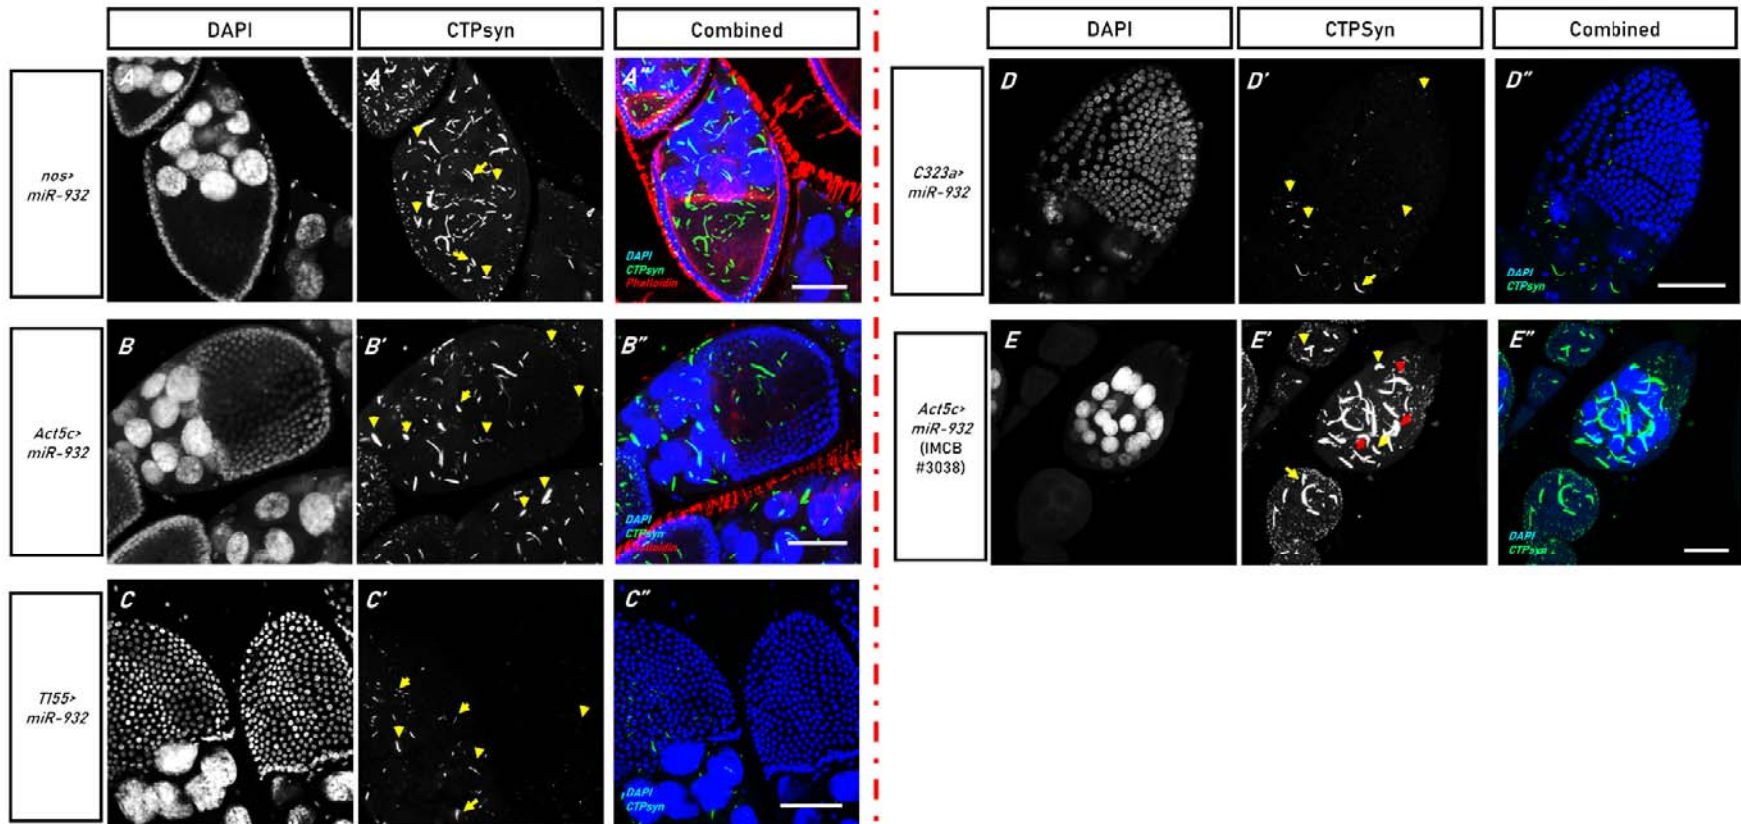

**Figure 7: MiR-932 confers a degree of lethality when overexpressed.** Schertel et. al (2012) showed that miR-932 to be lethal while being expressed by the ubiquitous driver Act5c. However, our study show that a reduced number of viable offsprings. Total emerged offspring for each of the lines carrying miR-932 construct are compared to other prime candidate miRNAs; and total average numbers as amassed from all of the non-survival affecting constructs. Whilst Student T-Test proves that miR-932 clearly reduces offspring survival in comparison to those miRNAs, it does not exert consistency in its sibling constructs, in which #3038 appears to confer most lethality. '†' symbolizes statistical significance ( $p < 0.05$ ) between miR-932 and other candidates, whereas '¥' symbolizes statistical significance ( $p < 0.05$ ) between #3038 to other mR-932 bearing lines.

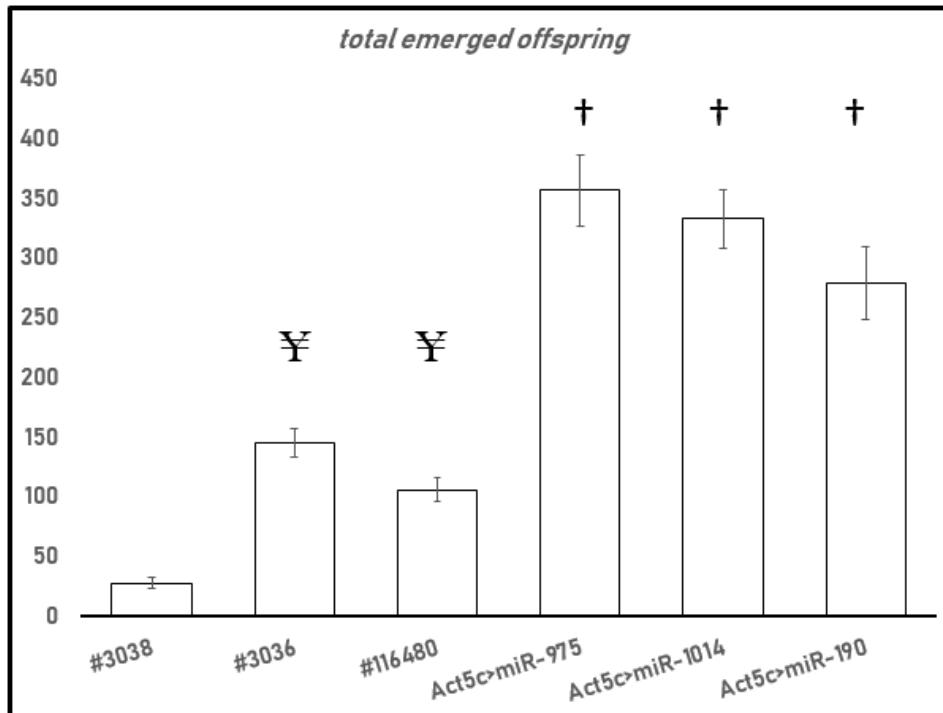

**Figure 8: Percentage of S2R+ cells carrying pTub-eGFP-3'UTRIsoC co-transfected with candidate miRNA-overexpression constructs. \*\*\* indicates a significant eGFP signal reduction from control, i.e. cells transfected with an empty pAc-plasmid backbone, without a pri-miRNA sequence.**

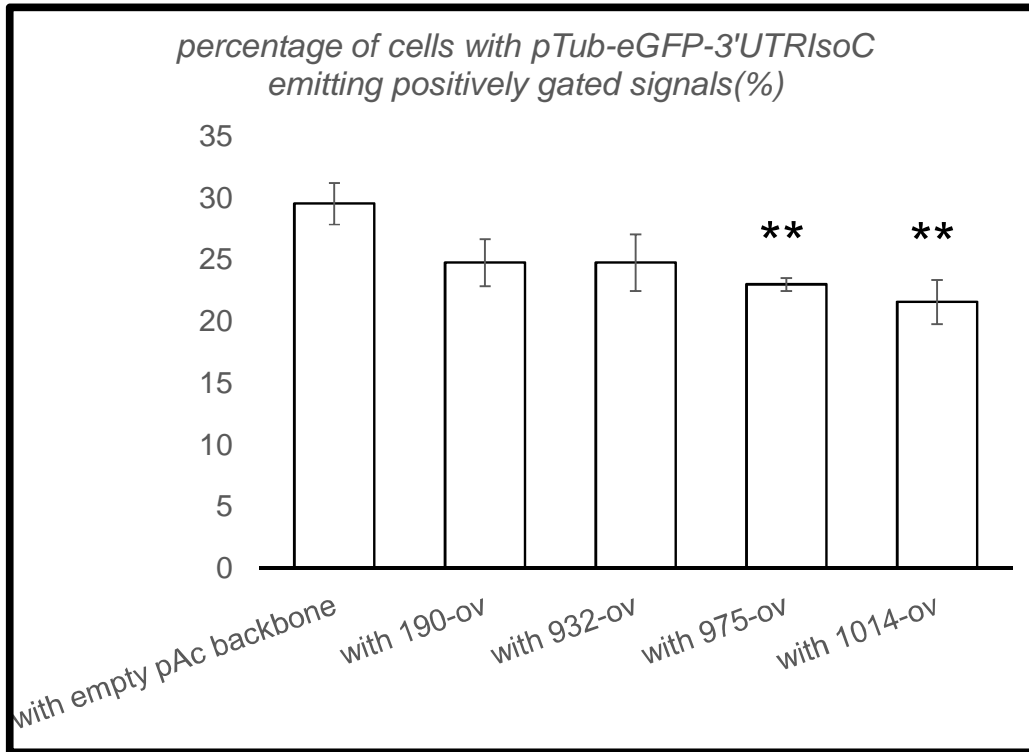

**Table 2: Target predictions of prime candidate miRNAs.** 'nd' represents not-described. All information is viewable on FlyBase.org through accession with FlyBase#

| Candidate miRNA | Gene FlyBase#            | Gene name                                            | Gene Ontology                           |                                                                |                                       | Expression and tissue localization                                                               |
|-----------------|--------------------------|------------------------------------------------------|-----------------------------------------|----------------------------------------------------------------|---------------------------------------|--------------------------------------------------------------------------------------------------|
|                 |                          |                                                      | Molecular function                      | Biological process                                             | Cellular component                    |                                                                                                  |
| <b>miR-190</b>  | CG33147; two variants    | Hs3st-A<br>(Heparan sulfate 3-O sulfotransferase-A)  | Enzyme                                  | Nd                                                             | nd                                    | Lowly expressed in reproductive tissue and adults of either sex                                  |
|                 | CG32848                  | VAcT<br>(Vesicular acetylcholine transporter)        | Transporter                             | Cellular transport and stimulus response                       | Membrane and macromolecular complexes | Lowly expressed in reproductive tissue; high in heads and wing muscle tissue                     |
|                 | CG12345; two variants    | ChAT<br>(Choline acetyltransferase)                  | Enzyme                                  | Signal transduction                                            | Cytosol and nucleus                   | Completely absent from reproductive tissue; functions are exclusively neurological               |
| <b>miR-932</b>  | CG13958; twelve isoforms | Sick<br>(Sickie)                                     | Cytoskeletal and small molecule binding | Development, stimulus response, cellular organization          | nd                                    | Lowly expressed in gonads but high in male accessory glands; integral for optic lobe development |
|                 | CG10671                  | fitm<br>(Fat storage inducing transmembrane protein) | nd                                      | Cellular transport and localization, development and behaviour | Transmembrane                         | Moderately high expression in ovaries, lower but significant in testes                           |

|                 |                          |                                                 |                                |                                                                                   |                                                    |                                                                                                                       |
|-----------------|--------------------------|-------------------------------------------------|--------------------------------|-----------------------------------------------------------------------------------|----------------------------------------------------|-----------------------------------------------------------------------------------------------------------------------|
|                 | CG11489; eleven isoforms | Srpk79D (Serine-arginine protein kinase at 79D) | Enzyme, small molecule binding | Cell organization, stimulus response, development, gene expression and signalling | Nucleus, neuron, and in many other cell components | Extremely high in testes, moderately high in ovaries; also enriched in embryos                                        |
| <b>miR-975</b>  | CG18584; six variants    | koi (klaroid)                                   | Microtubule organization       | Cell biogenesis and organization, organelle localization, DNA metabolism          | Nucleus and endomembrane system                    | High expression in ovaries, moderate in testes; also enriched in embryos                                              |
|                 | CG31147; two variants    | mthl1 (G-protein coupled receptor)              | nd                             | Stimulus response                                                                 | Transmembrane                                      | Absent from reproductive tissue, only found in embryos                                                                |
|                 | CG18497; eight isoforms  | spen (split ends)                               | Nucleic-acid binding           | Signal transduction, growth and axonal development                                | Nucleus                                            | Moderately high in ovaries, low in testes but higher in accessory glands; also enriched in CNS and brain              |
| <b>miR-1014</b> | CG10521; seven isoforms  | NetB (Netrin B)                                 | nd                             | Cellular development and stimulus response                                        | Extracellular                                      | Very negligible in reproductive tissue; but very high in embryos, third instar larvae, adult brains and CNS, fat body |

|  |                      |                                                          |                                  |                                                                                                  |                                  |                                                                                                                                                                  |
|--|----------------------|----------------------------------------------------------|----------------------------------|--------------------------------------------------------------------------------------------------|----------------------------------|------------------------------------------------------------------------------------------------------------------------------------------------------------------|
|  | CG7450; two isoforms | CrebA<br>(Cyclic-AMP response element binding protein A) | DNA-binding transcription factor | Development and gene expression                                                                  | Nucleus and polytene chromosome  | Enriched in salivary glands and fat bodies; high expression in ejaculatory bulb of testes and seminal vesicle; in females found in follicle cells (Smolik, 1992) |
|  | CG7962; two variants | CdsA<br>(CDP diglyceride synthetase)                     | Enzyme                           | Cellular transport and localization, development, reproduction, signalling and stimulus response | Membrane and endomembrane system | Very high expression in eye and head; also high in ovaries and moderately high in testes                                                                         |

**Figure 9: qPCR outcomes of predicted targets in miR-overexpressing cells and miR-overexpressing ovaries.** *CTPsynIsoC* quantification is also included. “\*\*” indicates a significant change in expression change to its counterparts e.g. *spen* in miR-975-overexpressing S2 cells (top) vs *spen* in miR-975-overexpressing ovaries (bottom). Only the ovarian graph of each miRNAs will be annotated if relevant.

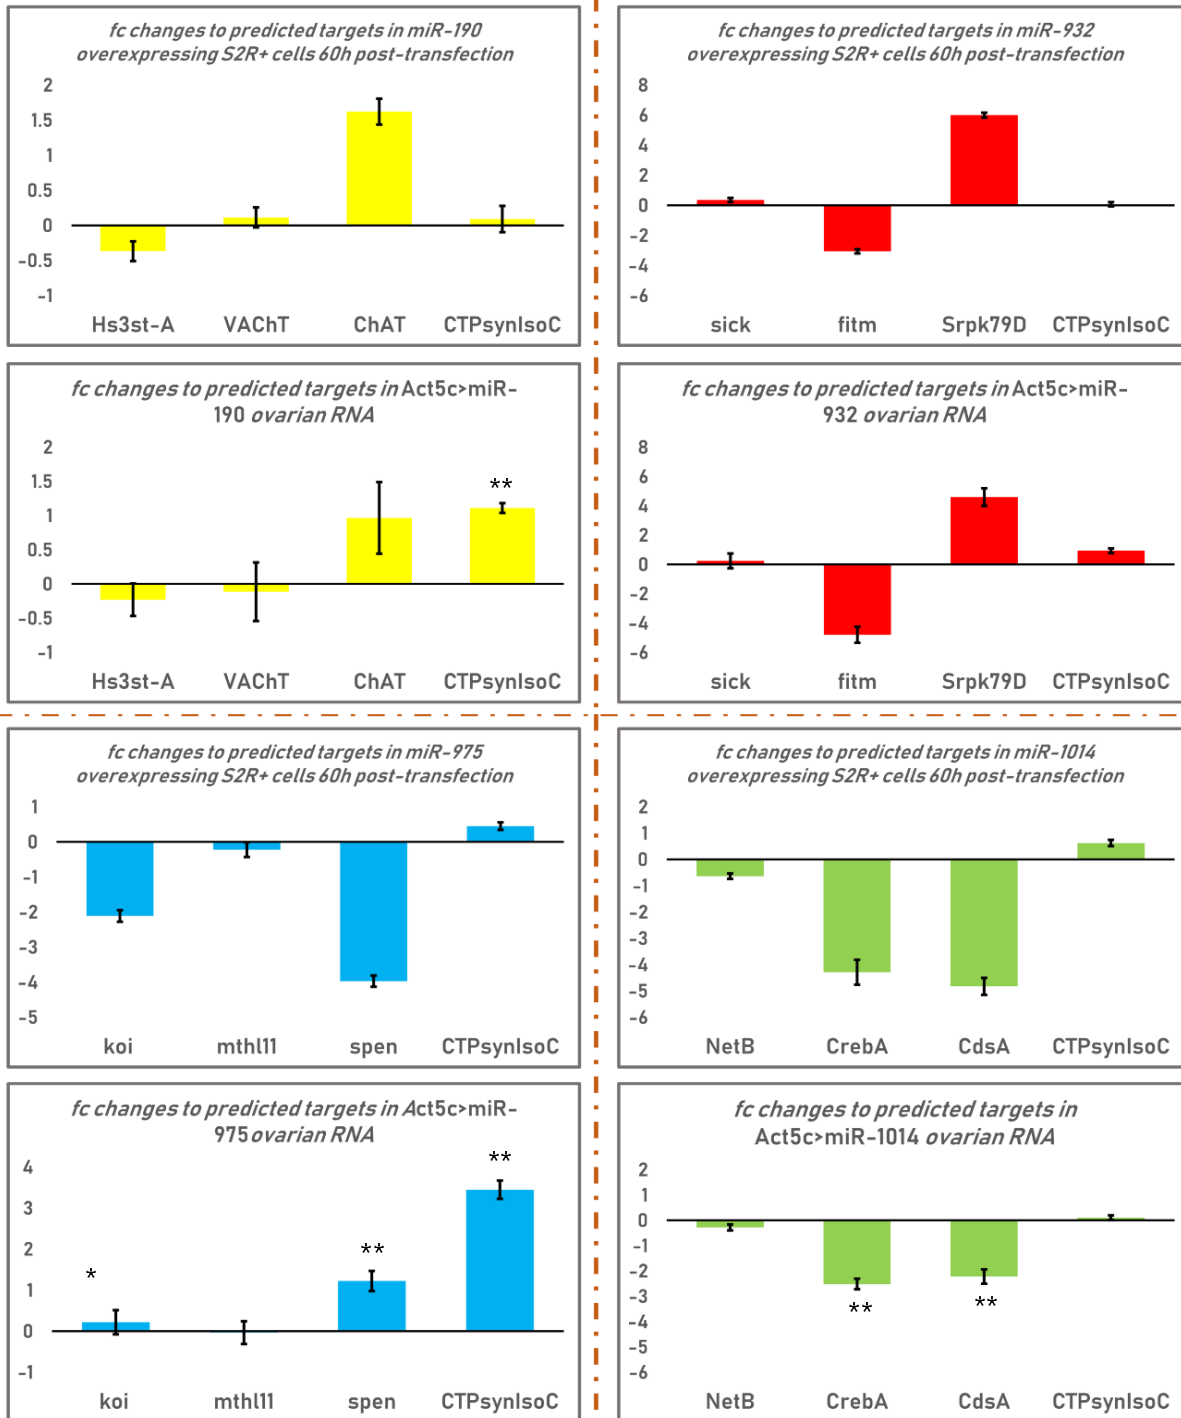

Source: http://biorxiv.org/content/10.1101/393181v2.full.pdf
